# Supplementary material
Source: MDPI journal article supplement (https://www.mdpi.com/2076-3417/13/17/9797)
Supplement: s1 [file s1]

## Supplementary Information

# Culturable diversity and biological properties of bacterial endophytes associated with the medicinal plants of the *Vernonia anthelmintica* (L.) Willd

Niu Litao <sup>1,2,3</sup>, Nigora Rustamova <sup>1,4,5</sup>, Paiziliya Paerhati <sup>1,2</sup>, Hui Xia Ning <sup>1,2\*</sup> and Abulimiti Yili <sup>1,2\*</sup>

- 1 Key Laboratory of Plants Resources and Chemistry of Arid Zone, Xinjiang Technical Institute of Physics and Chemistry, Chinese Academy of Sciences, Urumqi 830011, PR China; nlt@ms.xjb.ac.cn (N.L.); n.rustamova@yahoo.com (N.R.); 964690611@qq.com (P.P.); [ninghx@ms.xjb.ac.cn](mailto:ninghx@ms.xjb.ac.cn) (H.X.N); abu@ms.xjb.ac.cn (A.Y).
  - 2 State Key Laboratory Basis of Xinjiang Indigenous Medicinal Plants Resource Utilization, Xinjiang Technical Institute of Physics and Chemistry, Chinese Academy of Sciences, Urumqi 830011, PR China; nlt@ms.xjb.ac.cn (N.L.); 964690611@qq.com (P.P.); [ninghx@ms.xjb.ac.cn](mailto:ninghx@ms.xjb.ac.cn) (H.X.N); abu@ms.xjb.ac.cn (A.Y).
  - 3 University of Chinese Academy of Sciences, Beijing 100039, PR China; nlt@ms.xjb.ac.cn (N.L.); 964690611@qq.com (P.P.).
  - 4 Department of Biology, Samarkand State University, Samarkand 703004, Uzbekistan; n.rustamova@yahoo.com (N.R.).
  - 5 Department of Enzymology, Institute of Microbiology, Academy of Sciences of the Republic of Uzbekistan, Tashkent, Uzbekistan; n.rustamova@yahoo.com (N.R.).
- \* Correspondences: abu@ms.xjb.ac.cn; [ninghx@ms.xjb.ac.cn](mailto:ninghx@ms.xjb.ac.cn); Tel.: +86-991-3835679

**Abstract:** As one of the important traditional medicinal plants listed in the Chinese pharmacopoeia, *Vernonia anthelmintica* has been shown to possess various biological activities. In this study, we characterized culturable endophytic bacteria associated with the medicinal plant *V. anthelmintica* (L.) Willd collected from Hotan, within the Xinjiang autonomous region of China. Bacterial endophytes were identified by 16S rRNA gene sequence analysis and compared with similar sequences from the GenBank. Isolated strains exhibited 99.08-100% similarity to *Bacillus haynesii* XJB-5, *Bacillus proteolyticus* XJB-16, *Bacillus halotolerans* XJB-35, *Bacillus safensis* XJB-71, *Pseudomonas punonensis* XJB-7, *Lysinibacillus fusiformis* XJB-17, *Streptococcus lutetiensis* XJB-66, *Leclercia adecarboxylata* XJB-12, *Paenibacillus alvei* XJB-14 and *Pantoea agglomerans* XJB-62. The ethyl acetate extracts of the bacterial isolates demonstrated various biological activities such as antimicrobial, cytotoxic, antidiabetic, antioxidant and melanin content assay and tyrosinase activity in murine B16 cells. A crude extract of *B. halotolerans* XJB-35 showed higher biological activities than other bacterial strains; therefore, this strain was studied further in order to select the optimized parameter for enhancing the production of bioactive compounds. The optimal culture medium was found to be nutrient broth (NB)

medium using peptone as its carbon source and yeast extract as its nitrogen source. A 24 h incubation time produced the optimal conditions for the maximum growth of *B. halotolerans* XJB-35 and the production of bioactive compounds. Moreover, we investigated the non-polar chemical composition from the dichloromethane fraction using GC-MS analysis. Our findings provide valuable information regarding the production of bioactive secondary metabolites by *B. halotolerans* XJB-35, for use by the medicinal and pharmaceutical industry.

**Keywords:** Bacterial endophytes, antimicrobial, cytotoxic, antidiabetic, antioxidant activity, bioactive secondary metabolites

**Citation:** To be added by editorial staff during production.

Academic Editor: Firstname  
Lastname

Received: date

Revised: date

Accepted: date

Published: date

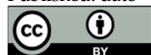

**Copyright:** © 2023 by the authors. Submitted for possible open access publication under the terms and conditions of the Creative Commons Attribution (CC BY) license (<https://creativecommons.org/licenses/by/4.0/>).

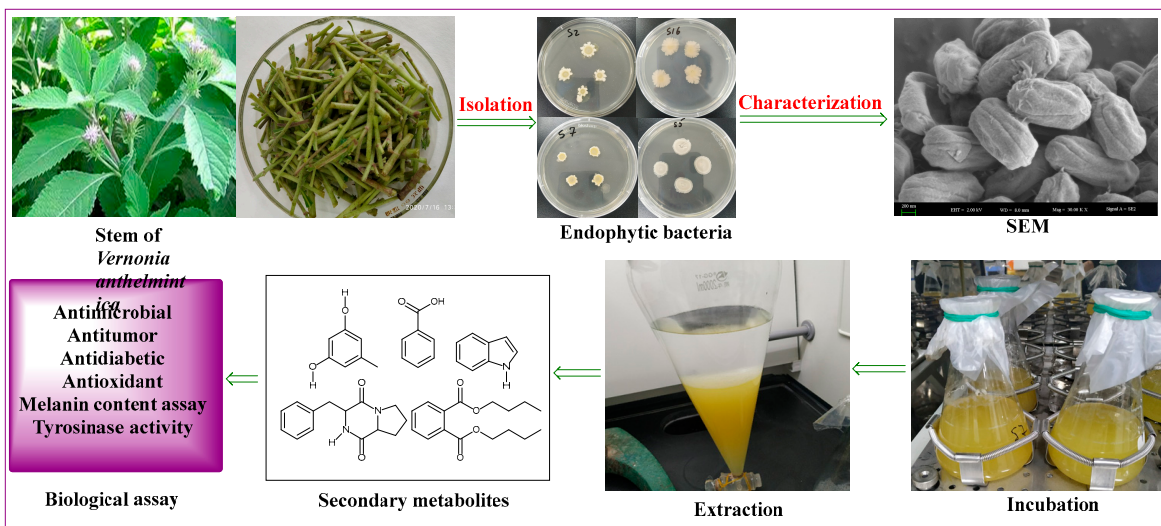

**Figure S1. Main approach of this work**

## Gene sequences of endophytic bacteria

### *Bacillus haynesii* XJB-6

TCTGTCCACCTTCGCGCGGTGGCTCCAAAAGGTTACCTCACCAGCTTCGGGTGTTACAAACTCTCGTGGTGTGACGGGCGGTGTACAAAGCCCGGGAACGTATTCACCGCGG  
CATGCTGATCCGCGATTACTAGCGATTCCAGCTTCACGCAGTCGAGTTGACAGACTGCGATCCGAAGTGAAGAACAGATTGTGGGATTGGCTTAGCCTCGCGGCTTCGCTGCCCTT  
TGTTCTGCCCATTTGTAGCAGCTGTGTAGCCACAGGTCAATAGGGGATGATGATTGACGTCATCCCCACCTTCCTCCGGTTTGTACCCGGCAGTCACCTTAGAGTGCCTCACTGA  
ATGCTGGCAACTAAGATCAAGGGTTGCGCTCGTTGCGGGACTTAACCAACATCTCAGCAGACGAGCTGACGACAACCATGACCACCTGTCACTCTGCCCCCGAAGGGGAAG  
CCCTATCTAGGGTTGTCAGAGGATGCAAGACCTGGTAAGGTTCTTCGGGTTGCTTCGAATTAACACCATGCTCCACCGCTTGTGCGGGGCCCGGTCAATTCCTTTGAGTTT  
CAGTCTTCGACCGTACTCCCCAGGCGGAGTGCTTAATGCGTTTGTGTCAGCACTAAAGGGCGGAACCCCTTAACACTTAGCACTCATCGTTACGCGGTGGACTACACGGGT  
ATCTAATCCTGTTGCTGCCCGACGCTTTCGGCGCTCAGCGTCAGTTACAGACAGAGAGTCGCTTCGCGACTGGTGTTCCTCCACATCTCTACGCATTTACCCGCTACACGTGG  
AATTCACCTCTCTCTGCACTCAAGTTCGCCAGTTTCCCAATGACCTCTCCCGGTTGAGCGGGGGGCTTTCACATCAGACTTAAGAAACCGCTGCGCGCGCTTACGCCCAA  
TAATTCGGGACAACGCTTGCCACCTAGTATTACCGCGGCTGCTGGCACGTAGTTAGCCGTGGCTTTCGTGGTTAGGTACCGTCAAGGTACCCCGCTATTCCGAACGGTACTTGTTC  
TTCCTAACACAGAGTTTACGATCCGAAACCTTCATCACTCAGCGCGGTGTCTCCGTACAGCTTTCGTCCATTGCGGAAGATTCCCTACTGCTGCCCTCCCGTAGGAGTCTG  
GGCGGTGTCTCAGTCCAGTGTGGCGGATCACCTCTCAGGTCCGGTACGCATCGTTGCTGGTAGGCGGTATCTCACCACCTAGTAAATGCGCCGCGGGTCCATCTGTAAGT  
GGTAGCTAAAGCCACCTTTTATAATTGAACATGCGGTTCATCAAGCATCCGGTATTAGCCGGGTTTCCCGGAGTTATCCAGTCTACAGGCAGGTACCCACCGTGTACT  
CACCCGTCCGCGCTAACATCAGGGAGCAAGTCCCATCTGTCGCTCGACTTGATGTATTAGGCACGCCGCGAGCTTCTGCTGAGCCAGATCCAACTT

### *Bacillus proteolyticus* XJB-16

TGCTATACATGCAAGTCGAGCGAATGGATTGAGAGCTTGCTCTTATGAAGTTAGCGCGGACGGGTGAGTAACACGTGGGTAACCTGCCCATAGACTGGGATAACTCCGGGA  
AACCGGGGCTAATACCGGATAACATTTGAACCTGCATGGTTGCAAAATGAAAGGCGGCTTCGGCTGTCACTTATGGATGGACCGCGTCCGATTAGCTAGTTGGTGAGGTAACG  
GCTCACCAAGGCAACGATGCGTAGCCGACCTGAGAGGGTGATCGGCCACACTGGGACTGAGACACGGCCAGACTCTACGGGAGGCGAGCAGTAGGGAATCTTCCGCAATGG  
ACGAAAGCTTGACGGAGCAACGCGCGGTGAGTGATGAAGGCTTTCGGGTCTGAAACTCTGTTGTTAGGGAAGAACAAGTGTAGTTGAATAAGCTGCGACCTTGACGGTACC  
TAACAGAAAGCCACGCGTAACACTGTCGAGCAGCGCGGTAAATAGCTAGGTGGAAGCGTTATCCGGAAATTATGGGCGTAAAGCGCGCGCAGGTGGTTTCTTAAGTCTGA  
TGTGAAGAAACCGGCTCAACCGTGGAGGTCATTGGAACCTGGGAGACTTGAAGTGCAGAAGAGGAAAGTGAATTCATGTGTAGCGGTGAATGCGTAGAGATATGGAAG  
AACACAGTGGCGAAGGCGACTTCTGGTCTGTAAGTACACTGAGGCGCGAAAGCGTGGGAGCAACAGGATTAGATACCTGGTAGTCCACCGCTAAACGATGAGTGCT  
AAGTGTAGAGGGTTTCCGCCCTTAGTGCTGAAGTTAACGCATTAAAGCACTCGCGCTGGGAGTAGCGGCCGAAGGCTGAAACTCAAGAGGATGACGGGGGCCGACAAAG  
CGGTGGAGCATGTGGTTTAAATTCGAAGCAACGCGAAGAACCTTACCAGCTCTTGACATCCTCTGAAACCCCTAGAGATAGGGCTTCTCCTTCGGAGCAGAGTAGCAGGTGGT  
GCATGGTTGCTGACGCTCGTGTGCTGAGATGTTGGGTTAAGTCCCGCAACGAGCGCAACCTTGATCTTAGTTCATCATTAAAGTTGGGCACCTTAAGGTGACTGCCCGGTGAC  
AAACCGAGGAAGGTGGGATGACGTCAAAATCATCATGCCCCTTATGACCTGGGCTACACACGTGCTACAATGGACGTAACAAGAGCTGCAAGACCGCGAGGTGGAGCTAA  
TCTCATAAACCGCTTCTAGTTCCGATTGTAGGCTGCAACTCGCTACATGAAGCTGGAATCGCTAGTAAATCGCGGATCAGCATGCCGCGGTGAATACGTTCCCGGGCTTGTAC  
CACACCGCCGCTACACCACGAGAGTTGTAACACCCGAAGTCCGTGGGGTAACCTTTTGGAGCCAGCCGCTAAGGTGGACAGA

### *Bacillus halotolerans* XJB-35

TGCTATACATGCAAGTCGAGCGAAGAGAGTTGCTCCCGGATGTTAGCGCGGACGGGTGAGTAACACGTGGGTAACCTGCCTGTAAGACTGGGATAACTCCGGGAAA  
CCGGGGCTAATACCGGATAGTTCTTGAACCGCATGGTTCAAGGATGAAGAGCGGTTTCGGCTGTCACTTACAGATGGACCCCGCGGCATTAGCTAGTTGGTGGGTAATGGC  
TCACCAAGGACGATGCGTAGCCGACCTGAGAGGGTGATCGGCCACACTGGGACTGAGACACGGCCAGACTCCTACGGGAGGCGAGCAGTAGGGAATCTCCGCAATGGAC  
GAAAGTCTGACGGAGCAACGCGCGGTGAGTGATGAAGGTTTTCGGATCGTAAAGCTCTGTTGTTAGGGAAGAACAAGTACCCTTCAATAGGGCGGTACCTTGACGGTACCTA  
ACCAGAAAGCCACGGCTAATACGTGCGCAGCAGCGCGGTAAATACGTAGGTGGCAAGCGTTGTCGGGAATTATTGGGCGTAAAGGGCTCGCAGGCGGTTCTTAACTGATG  
TGAAAGCCCGGCTCAACCGGGGAGGGTCAATTGGAACCTGGGGAACCTTGAAGTGCAGAAGAGGAGAGTGAATTCACGTGTAGCGGTGAAATGCGTAGAGATGTGGAGGAA  
CACCAGTGGCGAAGGCGACTCTGTGTTGTAAGTACGCTGAGGAGCGAAAGCGTGGGAGCGAAGCAGGATTAGATACCTGGTAGTCCACCGCTAAACGATGAGTGCTAA  
GTGTTAGGGGTTTCCGCCCTTAGTGCTGCTAGCTAACGCAATTAAGCACTCCGCTGGGAGTACGGTCCGAAGACTGAAACTCAAAGGAATTGACGGGGGCCGCAAGCG  
GTGGAGCATGTGGTTTAAATTCGAAGCAACGCGAAGAACCTTACCAGGTTGACATCCTTGAACATCTTGAAGATAGGACGTCCCTTCGGGGGCAAGGTGACAGGTGGTGC  
ATGGTTGCTGCTCAGCTCGTGTGCTGAGATGTTGGGTTAAGTCCCGCAACGAGCGCAACCTTGATCTTAGTTGCCAGCATTAGTTGGGCACTTAAGGTGACTGCCGGTGACA  
AACCGGAGGAAGGTGGGATGACGTCAAAATCATCATGCCCTTATGACCTGGGCTACACACGTGCTACAATGGACAGAAAGGGGACGCAACCGCGAGGTTAAGCCAT  
CCCAAAATCTGTTCTCAGTTCGGATCGCAGTCTGCAACTCGACTCGTGAAGCTGGAATCGTAGTAATCGCGGATCAGCATGCCGCGGTGAATACGTTCCCGGGCTTGTAC  
ACACCGCCGCTACACCACGAGGATTGTAACACCCGAAGTCGGTGAGGTAACCTTTATGAGCCAGCCGCGCAAGGTGGACAGA

### *Bacillus safensis* XJB-71

TGCTATACATGCAAGTCGAGCGAAGAGAGTTGCTCCCGGATGTTAGCGCGGACGGGTGAGTAACACGTGGGTAACCTGCCTGTAAGACTGGGATAACTCCGGGAAA  
CCGGAGCTAATACCGGATAGTTCTTGAACCGCATGGTTCAAGGATGAAGAGCGGTTTCGGCTGTCACTTACAGATGGACCCCGCGGCATTAGCTAGTTGGTGGGTAATGGC  
TCACCAAGGCGAGGATGCGTAGCCGACCTGAGAGGGTGATCGGCCACACTGGGACTGAGACACGGCCAGACTCCTACGGGAGGCGAGCAGTAGGGAATCTCCGCAATGGAC  
GAAAGTCTGACGGAGCAACGCGCGGTGAGTGATGAAGGTTTTCGGATCGTAAAGCTCTGTTGTTAGGGAAGAACAAGTGCAGAGATAACTGCTCGCACCTTGACGGGTACCTAA  
CCAGGAAGCAACGCGCTAAGTACGTGCGCAGCAGCGCGGTAAATACGTAGGTGGCAAGCGTTGTCGGGAATTATTGGGCGTAAAGGGCTCGCAGGCGGCTTCTTAAGTCTGATGTG  
AAAGCCCGGCTCAACCGGGGAGGGTCAATTGGAACCTGGGAACTTGAAGTGCAGAAGAGGAGAGTGAATTCACGTGTAGCGGTGAAATGCGTAGAGATGTGGAGGAACA  
CCAGTGGCGAAGGCGACTCTGGTCTGTAAGTACGCTGAGGAGCGAAAGCGTGGGAGCGAAGCAGGATTAGATACCTGGTAGTCCACCGCTAAACGATGAGTGCTAAGT  
GTAGGGGTTTCCGCCCTTAGCTGCTGACGTAACGATTAAGCACTCCGCTGGGGAGTAGCGTGCAGAGACTGAAACTCAAAGGAATTGACGGGGGCCCGCACAGCGGT  
GGAGCATGTGGTTTAAATTCGAAGCAACGCGAAGAACCTTACCAGGCTTTCGATCCTTGAACCTTAGAGATAGGGCTTTCCTTCGGGGACAGAGTGACAGGTGGTGCAT  
GGTTGTGCTGAGTCTGCTGAGATGTTGGGTTAAGTCCCGCAACGAGCGCAACCTTGATCTTAGTTGCCAGCAATTCAGTTGGGCACTTAAGGTGACTGCGGTGACAAA  
CCGAGGAAGGTTGGGATGACGTCAAAATCATCATGCCCTTATGACCTGGGCTACACACGTGCTACAATGGACAGAAACAAAGGGGTGCAAGACCGCAAGGTTTAGCCAATCCC  
ATAAATCTGTTCTCAGTTCGGATCGCATCTGCAACTGACTCGTGAAGCTGGAATCGTAGTAATCGCGGATCAGCATGCCGCGGTGAATACGTTCCCGGGCTTGTACACA  
CCGCGGCTACACCACGAGAGTTGCAACACCCGAAGTCGGT GAGGTAACCT TTATGGAGCC AGCCGCCGAA GGTGGCAGA

## *Pseudomonas punonensis* XJB-7

CAGGCTACACATGCAAGTCGAGCGGTTGACGGGAGCTTGCTCCCTGATTACGCGCGGACGGGTGAGTAATGCCTAGGAATCTGCCTATTAGTGGGGGACAACGTTTCGAAA  
GGAACGCTAATACCGCATACGTTCTACGGGAGAAAGCAGGGGACCTTCGGGCTTCGCGTAATGAGTACGCTTAGGTTCGGGTAAGAGCTCACCAG  
GCGACGATCCGTAACTGGTCTGAGAGGATGATCAGTCACACTGGAAGTACGACACGGTCCAGACTCCTACGGGAGGCAGCAGTGGGGAATATTGGACAATGGGCGAAAGCCT  
GATCCAGCCATGCCGCGTGTGTGAAGAAGGTCTTCGGATTGTAAAGCACTTTAAGTTGGGAGGAAGGGTTGTAGATTAATACTCTGCAATTTTGACGTTACCCGACAGAATAAGC  
ACCGGCTAACTCTGTGCCAGACGCCGCGTTAATACAGAGGGTGCAAGCGTTAATCGGAATTACTGGGCGTAAAGCGCGCGTAGGTGGTTTGTAAAGTTGGATGTGAAGGCC  
GGGCTCAACCTGGGAAGTGCATCCAAAAGTGGCAAGCTAGAGTACGGTAGAGGGTGGTGGAAATTTCTGTGTAGCGGTGAAATGCGTAGATATAGGAAGGAACACCAAGTGGC  
GAAGGCGACCACTGGACTGATCTGACACTGAGGTGCGAAAGCGTGGGGAGCAAAACGATTAGATACCTTGGTAGTCCACGCCGTAACGATGTCAACTAGCCGTTGGGT  
CCTTGAGAACTTAGTGGCGCAGCTAACGCATTAAGTTGACCGCTGGGGAGTACGCGCCGAAGGTTAAAACTCAAAATGAATTGACGGGGGCCGACAAAGCGGTGGAGCATGT  
GGTTTAATTCGAAGCAACGCGAAGAACCTTACCTGGCCTTGACATGCTGAGAACTTCCAGAGATGGATTGGTGCCTTCGGGAAGTACAGACAGAGTGTGTCATGGCTGTCTGC  
AGCTCGTGTCTGAGATGTTGGGTTAAGTCCCGTAACGAGCGCAACCCCTTGTCTTAGTTACCAAGCAGCTTATGGTGGGAAGTCTAAGGAGACTGCCGGTGACAAACCGGAGG  
AAGGTGGGGTAGCGTCAAGTCATCATGGCCCTTACGGCCAGGGCTACACAGCTGCTACAATGGTTCGGTACAAAGGGTGTCCAAGCCGCGAGGTGGAGCTAATCCCATAAAA  
CAGTCGTAGTCCGGATCGCAGTCTGCAACTCGACTGCGTGAAAGTCGGAATCGCTAGTAATCGTAATCAGAATGTACGGTGAATACGTTCCCGGGCCTTGACACACCGGCCG  
TCACACCATGGGAGTGGGTTGCACCAGAAGTAGCTAGCTTAACCTTCGGGAGGACGGTACCACGGTGTGATCA

## *Lysinibacillus* XJB-17

TGCTATACATGCAAGTCGAGCGAACAGAGAAGGAGCTTGCTCCTTTGACGTTAGCGCGGACGGGTGAGTAACACGTGGGCAACCTACCTTATAGTTTGGGATAACTCCGGGA  
AACCGGGTAACTTAACCGGAATAA1CTGTTTACCTCATGGTGAAACACTGAAAGACGGTTTCGGCTGTCTGCTATAGGATGGGCCCGCGGCGCATTAGCTAGTTGGTGAGGTAACG  
GCTCACCAAGGCGACGATGCGTAGCCGACCTGAGAGGGTGATCGGCCACACTGGGACTGAGACACGGCCAGACTCCTACGGGAGGCAGCAGTAGGGAATCTTCCACAATGG  
GCGAAAGCCTGATGGAGCAACGCGCGGTGAGTGAAGAAGGATTTTCGGTTCGTA AAAACTCTGTTGTAAGGGAAGAACAAAGTACAGTAGTAACCTGGCTGACCTTGACGGTACCT  
TATTAGAAAGCCACGGCTAACTACGTGCCAGCAGCCGCGGTAATACGTAGGTGGCAAGCGTTGTCCGGAATATTATGGGCGTAAAGCGCGCGCAGGTGGTTTCTTAAGTCTGAT  
GTGAAAGCCCAACGCTCAACCGTGGAGGGTCA1TTGGAAGTGGGAGACTTGAGTGCAGAAGAGGATAGTGGAAATCCAAGTGTAGCGGTGAAATGCGTAGAGATTTGGAGGA  
ACACCAGTGGCGAAGGCGACTATCTGGTCTGTAAGTACACTGAGGCGCGAAAGCGTGGGGAGCAAAACAGGATTAGATACCTGGTAGTCCACGCCGTAACAGTAGAGTGCTA  
AGTGTAGGGGGTTTCGGCCCTTAGTGCTGCAGCTAACGCATTAAGCACTTCCGCTGGGGAGTAGCGGTGCGAAGACTGAAACTCAAAGGAATTTGACGGGGGGCCGCGACAAGC  
GTGGGAGCATGTGGTTTAATTTCGAAGCAACGCGAAGAACCTTACCAGGCTTGACATCCGTTGACCACTGTAGAGATATGGTTTCCCTTCGGGGGCAACGGTGTGACAGGCGGT  
GCATGGTTGTCTGACGCTCGTGTCTGAGATGTTGGGTTAAGTCCCGCAACGAGCGCAACCCCTTGATCTTAGTGTCCATCATTTAGTTGGGCACCTCTAAGGTGACTGCCGGTGAC  
AAACCGGAGGAAGGTGGGGATGACGTCAAAATCATCATGCCCTTATGACCTGGGCTACACACGTGCTACAATGGACGATACAAACGGTTGCCAACTCGCGAGAGGGAGCTAAT  
CCGATAAAGTCGTTCTCAGTTCGGATTGTAGGCTGCAACTCGCTACATGAAGCCGGAATCGCTAGTAATCGCGGATCAGCATGCCGCGTGAATACGTTCCCGGGCCTTGATACAC  
ACACCGCCCGTCAACACCAGAGAGTTTGTAAACCCGAAGTCGGTGAGGTAACCTTTTGAGGCCAGCCGCGGAAGGTGGATAGA

## *Streptococcus lutetiensis* XJB-66

TGCTATACATGCAAGTAGAACCGTGAAGACTTTAGCTTGCTAAAGTTGGAAGAGTTGCGAACGGGTGAGTAACCGGTAGGTAACCTGCCTACTAGCGGGGGATAACTATTGGA  
AACGATAGCTAATACCGCATTAACGACATTTAACCCATGTTAGATGCTGAAAGGAGCAATTGCTTCACTAGTAGATGGACCTGCGTGTGATTAGCTAGTTGGTGAGGTAAACGGC  
TCACCAAGGCGACGATACATAGCTGCGGAGGGTGATCGGCCACACTGGGACTGAGACACGGCCAGACTCCTACGGGAGGCAGCAGTAGGGAATCTTCCGGAATGGG  
GCAACCTGACCCGAGCAACGCCGCGTGAGTGAAGAAGGTTTTCGGATTGTAAGGCTCTGTTGTAAGAGAAGAACGTTGTGTGAGAGTGGAAAGTTACACAGTGACCGGTAACCT  
ACCAGAAAGGGACGGCTAACTACGTGCCAGCAGCCGCGGTAATACGTAGGTCCCGAGCGTTGTCCGGATTATTATGGGCGTAAAGCGAGCGCAGGCGGTTTAATAAGTCTGAAG  
TTAAAGGCAGTGGCTTAACCATTTGCTGTTTGGAAACTGTTAGACTTGAGTGCAGAAGGGGAGAGTGGAAATTCATGTGTAGCGGTGAAATGCGTAGATATATGGAGGAACA  
CCGGTGGCGAAAGCGGCTCTCTGGTCTGTAAGTACGCTGAGGCTCGAAAGCGTGGGGAGCAAAACAGGATTAGATACCTCGTAGTCCACGCCGTAAACGATGAGTGTGATAGGT  
GTTAGGCCCTTTCGGGGCTTAGTGCCGCGAGCTAACGCATTAAGCACTCCGCTGGGGAGTAGCAGCCGCAAGGTTGAAACTCAAAGGAATTCAGCGGGGCCGCGACAAGCGGT  
GGAGCATGTGGTTAATTTCGAAGCAACGCGAAGAACCTTACCAGGCTTGACATCCCGATTCCTATCTCTAGAGATAGGAAGTTTCTTCGGAACACTGCGTGACAGGTTGCTGATG  
GTTGTCGTCAGCTCGTGTGAGATGTTGGGTTAAGTCCCGCAACGAGCGCAACCCCTATTGTTAGTGGCATCATTAAGTTGGGCACCTAGCAGGACTGCCGGTAAATAAAC  
CGGAGGAAGTGGGGATGACGTCAAAATCATCATGCCCTTATGACCTGGGCTACACACGTGCTACAATGGTTGGTACAAAGAGTGCAGTGCAGGTAAGCGGATCGGTGACGGCAAGCAAATCTCT  
TAAAGCCAATCTCAGTTCCGATTGTAGGCTGCAACTCGCCTACATGAAGTCGGAATCGCTAGTAATCGCGGATCAGCAGCCGCGGTGAATACGTTCCCGGGCCTTGATACACAC  
CGCCGCTCACACCAAGAGATTGTGAACCCGAAGTCGGTGAGGTAACCTTTAGGAGCCAGCCGCGTAAGGTGGATAGA

## *Leclercia adecarboxylata* XJB-12

CGGCAGGCCTACACATGCAAGTCGAGCGGTAGCACAGGGAGCTTGCTCCTGGGTGACGAGCGCGGACGGGTGAGTAATGTCTGGGAAACTGCCTGATGGAGGGGGATAACT  
ACTGGAAACGGTAGCTAATACCGCATAACTGTCGAAGACAAAGAGGGGGACCTTCGGGCCCTTGCCATCAGATGTGCCAGATGGGATAGCTAGTAGAGTTGGGGTAACGGC  
TCACCTACCGGTAGCTCCCTAGCTGGTCTGAGAGGATGACCAGCCACACTGGAATCTGAGACACGGTCCAGACTCCTACGGGAGGCAGCAGTGGGGAATATTGCACAATGGGCG  
CAAGCCTGATGCAAGCCATCGCCGCGTGTATGAAGAAGGCGCTTCGGGTTGTAAGTACTTTACGCGGGGAGGAAGGTTGTGAGGTTAATAACCTCAGCAATTGACGTTACCCGCA  
GAAGAAGCAGCGGTAACTCCGTGCCAGCAGCGCGGTAATACGGAGGGTGCAACGTTAATCGGAATTACTGGGCGTAAAGCGCACGCGAGGCGGTCTGTCAAGTCGGATGTG  
AAATCCCGGGCTCAACCTGGGAAGTGCATTTCGAAACTGGCAGGCTAGAGTCTTGTAGAGGGGGGTAGAATTCAGGTGTAGCGGTGAAATGCGTAGAGATCTGGAGGAATGG  
TGGCGAAGCGGCCCCCTGGACAAGAGACTGACGCTCAGGTGCGAAAGCGTGGGGAGCAAAACAGGATTAGATACCTCGTAGTCCACGCCGTAAACGATGTGCACTTGGAGGT  
TGTTCCCTTGAGGAGTGGCTTCGGGAGTAACTGACGCGTTAAGTCGACCGCTGGGGAGTAGCGCCGCAAGGTTAAAACTCAAAATGAATTGACGGGGGCCGCAACAGCGGTGGAG  
CATGTGGTTTAATTTCGATGCAACCGCGAAGAACCTTACCTACTCTTGACATCCAGAGAAGTTCCTCAGAGATGGATTGGTGCCTTCGGGAAGCTCTGAGACAGAGGTGTGCAATGGCTG  
TCGTGACGCTCGTGTGTGAAATGTTGGGTTAAGTCCCGCAACGAGCGCAACCCCTTATCCCTTTGTGCCAGCGGTTTCGGCCGGGAAGCTCAAAGGGAAGTCTGCAAGTGAATAACTGG  
AGGAAGGTGGGGATGACGTCAAGTCATCATGGCCCTTACGAGTAGGGCTACACAGCTGTACAATGGCGCATACAAAGAGAAGCGACCTTCGCGAGAGCAAGCGGACCTCATA  
AAGTGCCTGATGTTCGGATTGTGCAACTCGACTGCCATGGAAGTCGGAATCGCTAGTAATCGATGACATGCAAGTACGATCAGAATGCTACGTTGGAATACGTTCCCGGGCCTTGACACACCG  
CCCGTACACCATGGGAGTGGGTTGCAAAAGAAGTAGGTAGCTTAACCTTCGGGAGGGCGCTTACCACCTTTGGATCA

## *Paenibacillus alvei* XJB-14

TGCTATACATGCAAGTCGAGCGGACTTGATGGAAGTCTTGCACTCCTGATGGTTAGCGGCGGACGGGTGAGTAACACGTAGGTAACCTGCCCATAAAGACTGGGATAACCCAG  
GAAACGTGAGCTAATACCCAGATAGGCATTTTCTCGCATGAGGGAATGATGAAGAGCGGCAACTTGCCACTTATGGATGGACCTGCGGCGCATAGCTAGTGTGGTAAGGTA  
ACGGCTTACCAAGGCGACGATGCGTAGCCGACCTGAGAGGGTGATCGGCCACACTGGGACTGAGACACGGCCAGACTCCTACGGGAGGCAGCAGTAGGGAATCTTCCGCAA  
TGGACGAAAGTCTGACGGAGCAACGCCGCGTGAGTGATGAAGGTTTTTCGGATCGTAAGGCTCTGTTGCCAGGGAAGAACGCCTAGGAGAGTAAGTCTCTTAGGGTGACGGTA  
CCTGAGAAGAAAGCCCGGCTAACTACGTGCCAGCAGCCGCGGTAATACGTAGGGGGCGAGCGTTGTCCGGAATTATTGGGCGTAAAGCGCGCGCAAGCGGCAATGTAAGTT  
GGGTGTTTAAACCTAGGGCTCAACCTTGGGTGCGATCCAAAAGTGCATAGCTTGAGTACAGAAGGGAAGTGGAAATCCACGTGTAGCGGTGAAATGCGTAGAGATGTGGAG  
GAACACCAAGTGGCGAAGGCGACTTTCTGGGCTGTAAGTACGCTGAGGCGCGAAAGCGTGGGGAGCAAAACAGGATTAGATACCTCGTAGTCCACGCCGTAAACGATGAATG  
CTAGGTGTTAGGGGTTTCGATACCTTGGTGCCGAAGTTAACACATTAAGCAATTCGCGCTGGGGAGTAGCGGTGCGAAGACTGAAACTCAAAGGAATTTGACGGGGACCCGCA  
AGCAGTGGAGTATGTGGTTTAATTTCGAAGCAACGCGAAGAACCTTACCAGGCTTGACATCTGAAATGACCCGTCTAGAGATAGGGCTTTCTTCGGGACATTCAAGACAGGTTGG  
TGCAATGGTTGTCGTCAGCTCGTGTGCTGAGATGTTGGGTTAAGTCCCGCAACGAGCGCAACCCCTTAACCTTAGTTGCCAGCATTAGTTGGGCACCTAGAGTGACTGCCGGTG  
ACAAACCGGAGGAAGGTTGGGATGACGTCAAAATCATCATGCCCTTATGACCTGGGCTACACAGCTACTACAATGGTCGGTACAACGGGAAGCGAAGCCGCGAGGTGGAGCC  
AATCCTTAAAGAGCGGATCTCAGTTCGGATTGCAAGGTCGAACCTCGCCTGACATGAAGTCGGAATCGCTAGTAATCGCGGATCAGCATGCCGCGGTGAATACGTTCCCGGGCCTTGACACACCG  
TACACACCGCCGTCACACCACGAGAGTTTACAACACCCGAAGTCGGTGAGGTAACCCGAAGGAGCCAGCCGCGGAAGGTGGGTAGA

## *Pantoea agglomerans* XJB-62

CGGCAGGCTACACATGCAAGTCGAACGGTAGCACAGAGAGCTTGCTCTCGGGTGACGAGTGGCGGACGGGTGAGTAATGTCTGGGAAACTGCCTGATGGAGGGGGATAACTA  
CTGGAAACCGTAGCTAATAACCGCATAACTGTCGCAAGACCAAAGAGGGGGACCTTCGGGCCCTTGCCATCAGATGTGCCAGATGGGATTAGCTAGTAGAGTTGGGTAACGGCT  
CACTTAGGCGACGATCCCTAGCTGGTCTGAGAGGATGACCAGCCACACTGGAAGTCTGAGACACGGTCCAGACTCCTACGGGAGGCAGCAGTGGGGAATATTGCACAATGGGCG  
CAAGCCTGATGCGACGCAATGCCGCGTGTATGAAGAAGGCGCTTCGGGTTGAAAGTACTTTACGCGGGGAGGAAGGTTGTGGTTAATAACCGGAGCAATTGACGTTAACCCGCA  
GAAGAAGCAGCCGCTAACTCCGTGCCAGAGCCGCGGTAATACGGAGGGTGCAAGGTTAATCGGAATTACTGGGCGTAAAGCGCACGCGAGGCGGTCTGTCAAGTCCGATGT  
GAAATCCCGGGCTAACCTTCGGAAGTGCATTCGAAACTGGCAAGTCTGATGAGTGGGGTAGAATTTCCAGGTGTAGCGGTGAAATTCAGGATGAGGATCTCGGAGAGCAAGCGGACCT  
CCGCTGGCGAAGGCGGCCCTTGACAAAAGACTGACGCTCAGGTGCGAAAGCGTGGGGAGCAAAACAGGATTAGATACCTGGTAGTCCACGCCGTAAACGATGTGCACTTGG  
AGGTTGTGCCCTTGAGCGCTGGCTTCCGGAGCTAACGCGTTAAGTCGACCGCTGGGGAGTAGCGGCGCAAGGTAAAACTCAAAATGAATTGACGGGGGCCGCGACCAAGCGGT  
GGAGCTGTGGTTTAATTCGATGCAACGCGGAAGAACCTTACCTACTTGTACATCCAGAGAACTTCCAGAGATGGATTGGTGCCTTCGGGAAGTGTGAGACAGGTTGTCATG  
GCTGTGCTCAGCTCGGTTGTGAAATGTGTGGTTAAGTCCCGCAACGAGCGCAACCCCTTATCCTTTGTTGCCAGCGGTTAGGCCGGGAAGCTCAAAGGAGACTGCCAGTGATAAAA  
CTGGAGAGAGGTGGGATGAGTCAAGTCAAGTCTATGGCCCTACGAGTAGGGCTACACAGCTGCTACAATGGCGCATACAAAGAGAAGCGACCTCGCGAGAGCAAGCGGACCT  
CATAAAGTGCCTGCTAGTCCGGATTGGAGTCTGCAACTCGACTCCATGAAGTCGGAATCGCTAGTAATCGTAGATCAGAATGCTACGGTGAATACGTTCCCGGGCCTTGACAC  
ACCGCCCGTCAACCATGGGAGTGGGTTGCAAAAGAAGTAGGTAGCTTAACCTTCGGGAGGGCGCTTACCACCTTTGGATGCA

## HPLC Analysis of secondary metabolites produced by endophytic bacteria

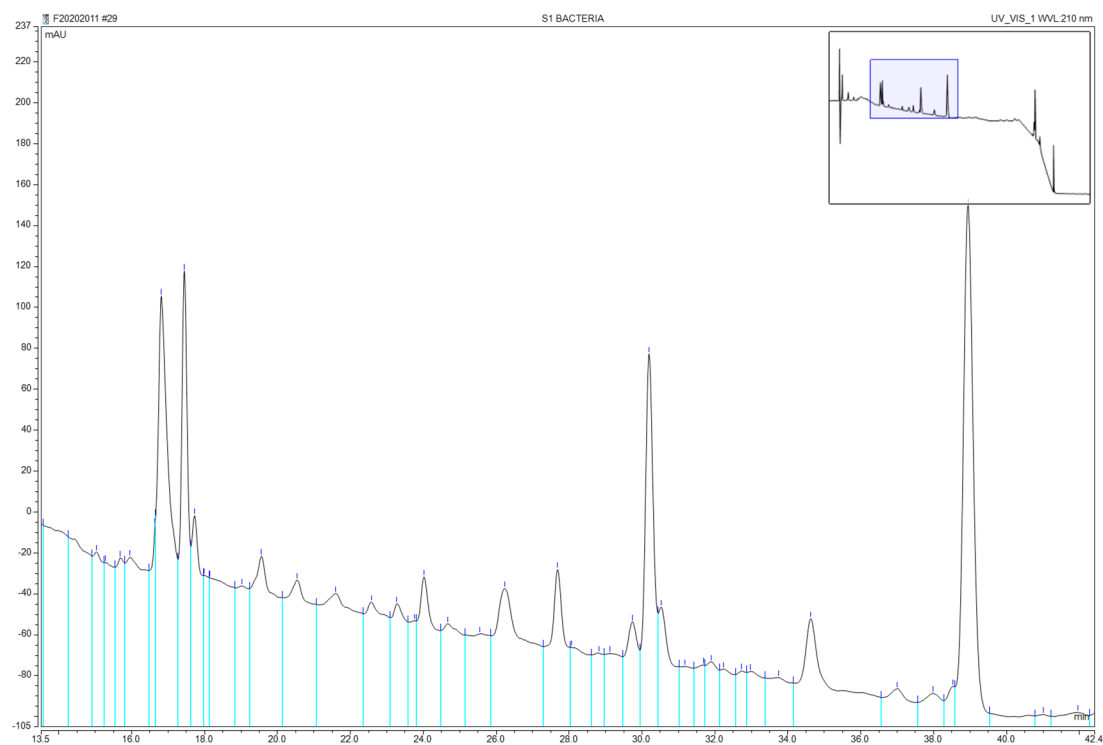

**Figure S2.** HPLC Analysis of natural products synthesized by endophytic bacteria *B. haynesii* XJB-5

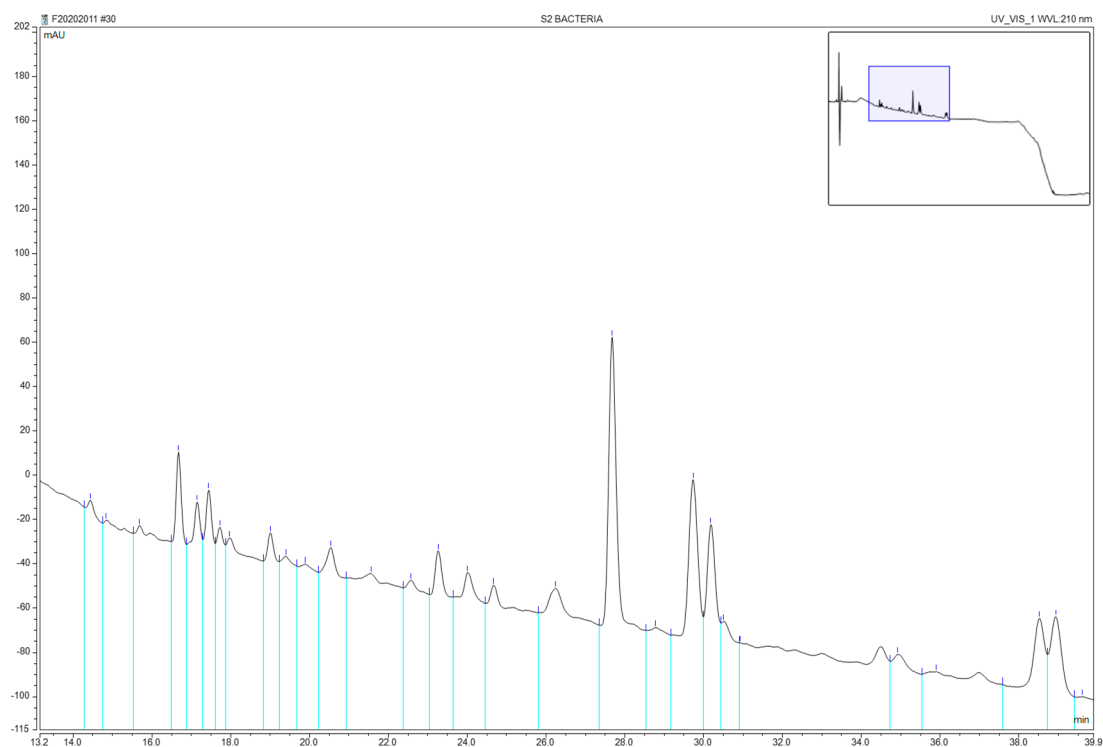

**Figure S3.** HPLC Analysis of natural products synthesized by endophytic bacteria *P. punonensis* XJB-7

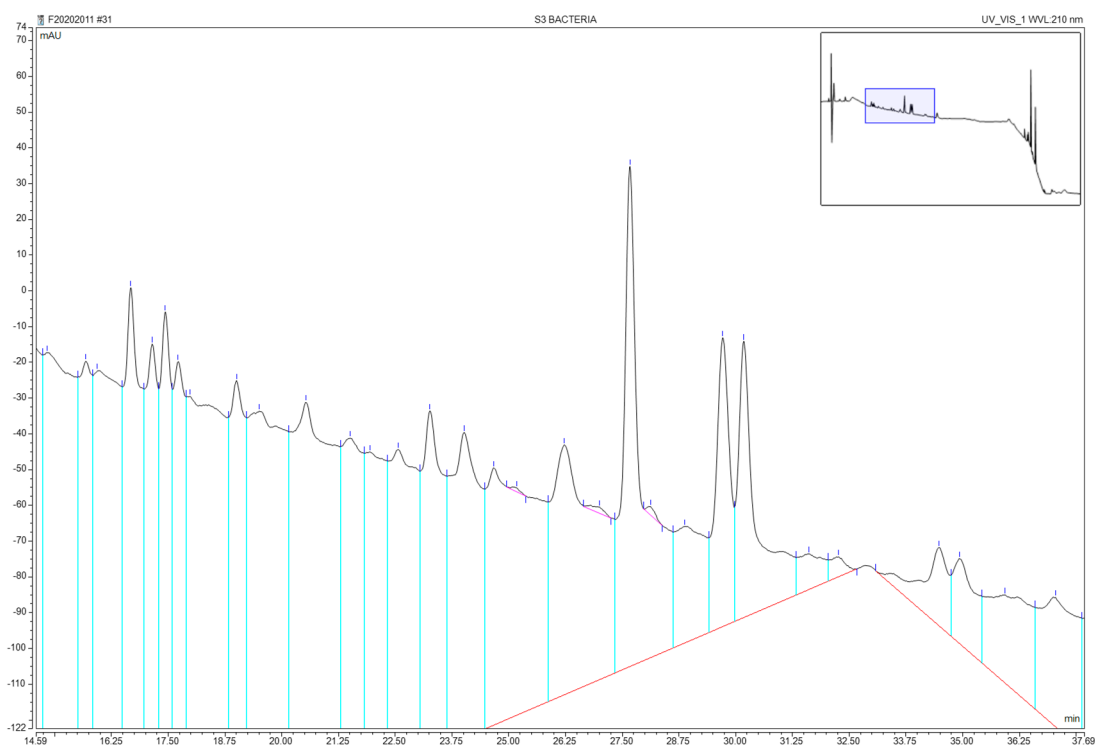

**Figure S4.** HPLC Analysis of natural products synthesized by endophytic bacterium *L. fusiformis* XJB-17

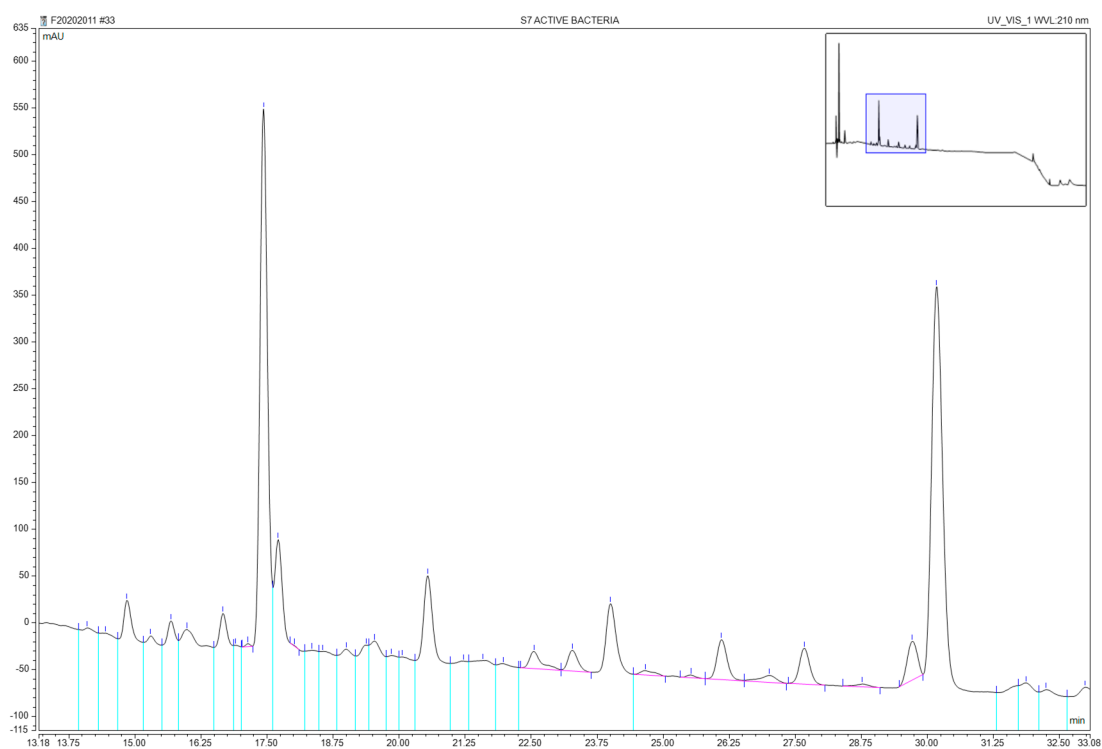

**Figure S5.** HPLC Analysis of natural products synthesized by endophytic bacterium *B. halotolerans* XJB-35

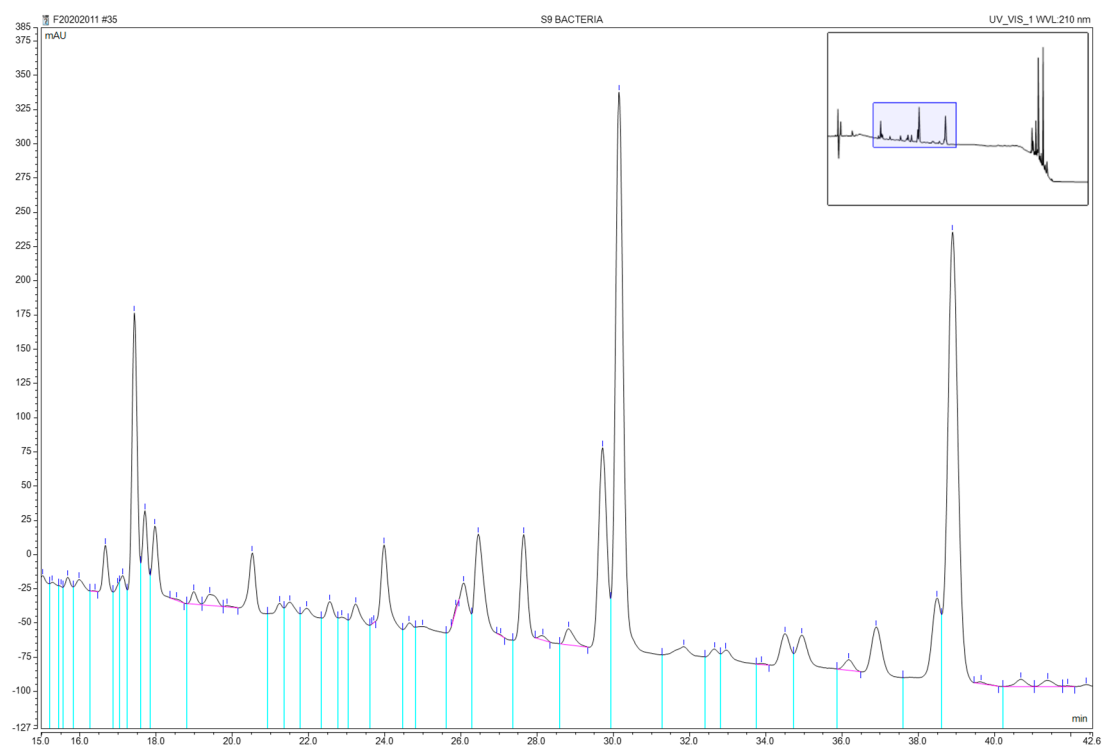

**Figure S6.** HPLC Analysis of natural products synthesized by endophytic bacteria *B. safensis* XJB-71

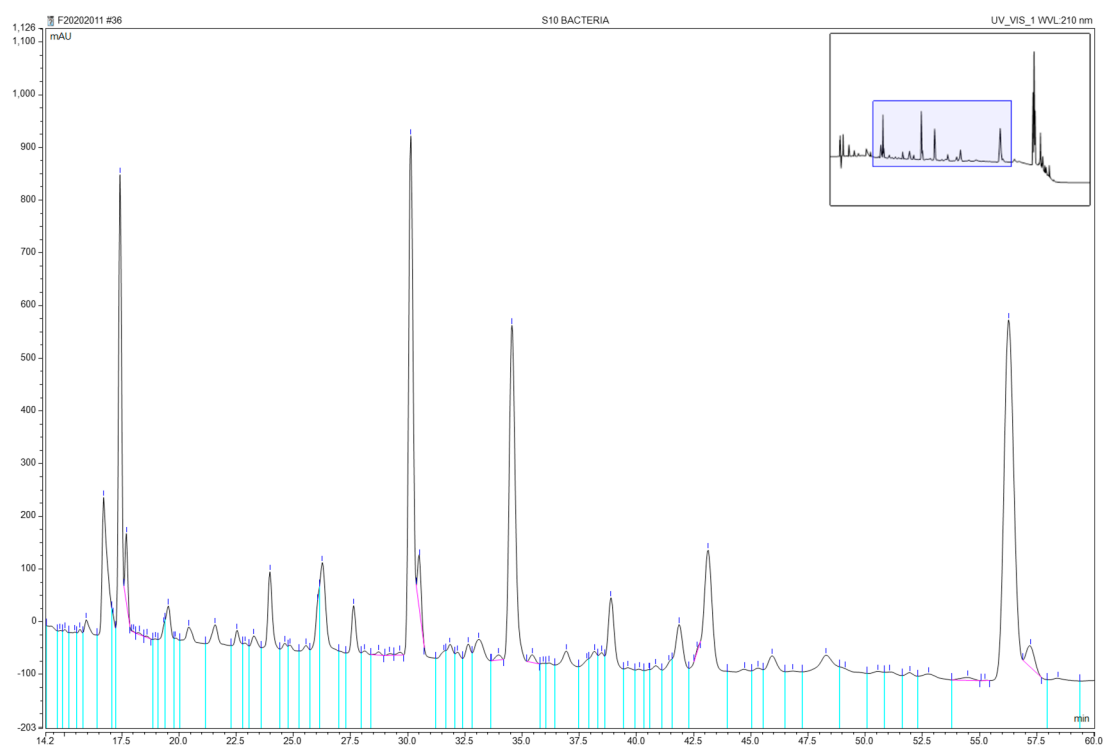

**Figure S7.** HPLC Analysis of natural products synthesized by endophytic bacteria *S. lutetiensis* XJB-66

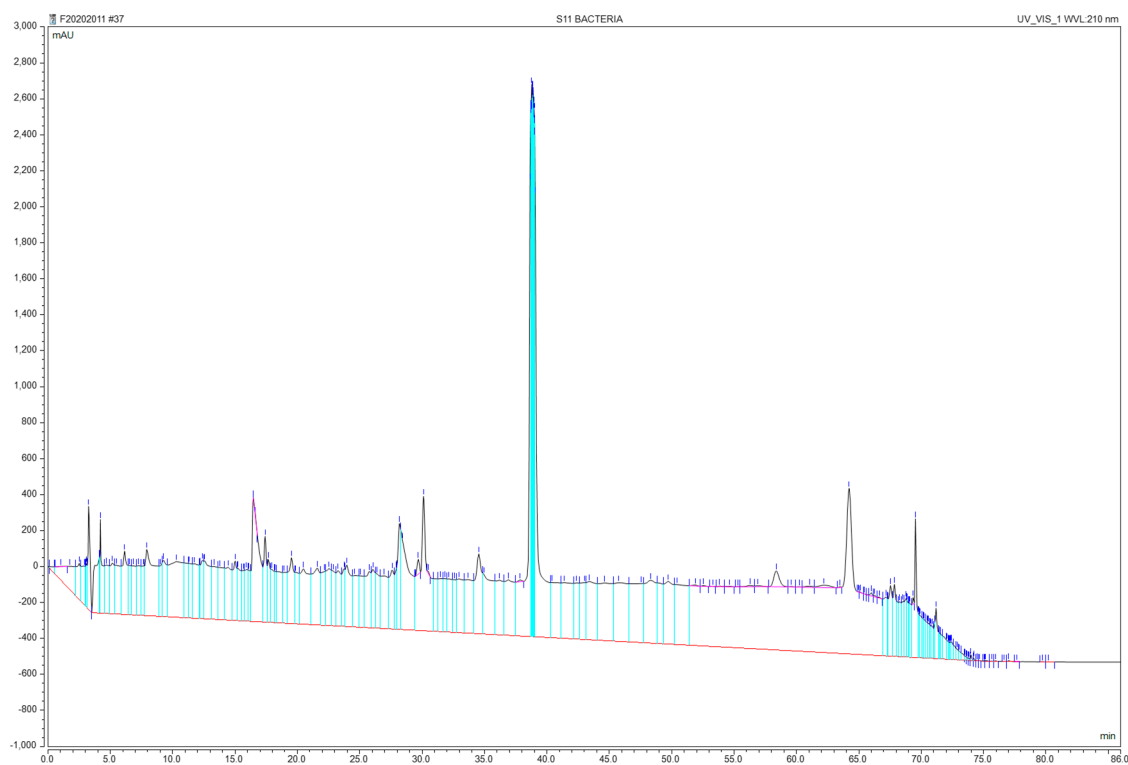

**Figure S8.** HPLC Analysis of natural products synthesized by endophytic bacteria *L. adecarboxylata* XJB-12

**HPLC Analysis of natural products synthesized in different incubation time by most active endophytic bacteria *B. halotolerans* XJB-35**

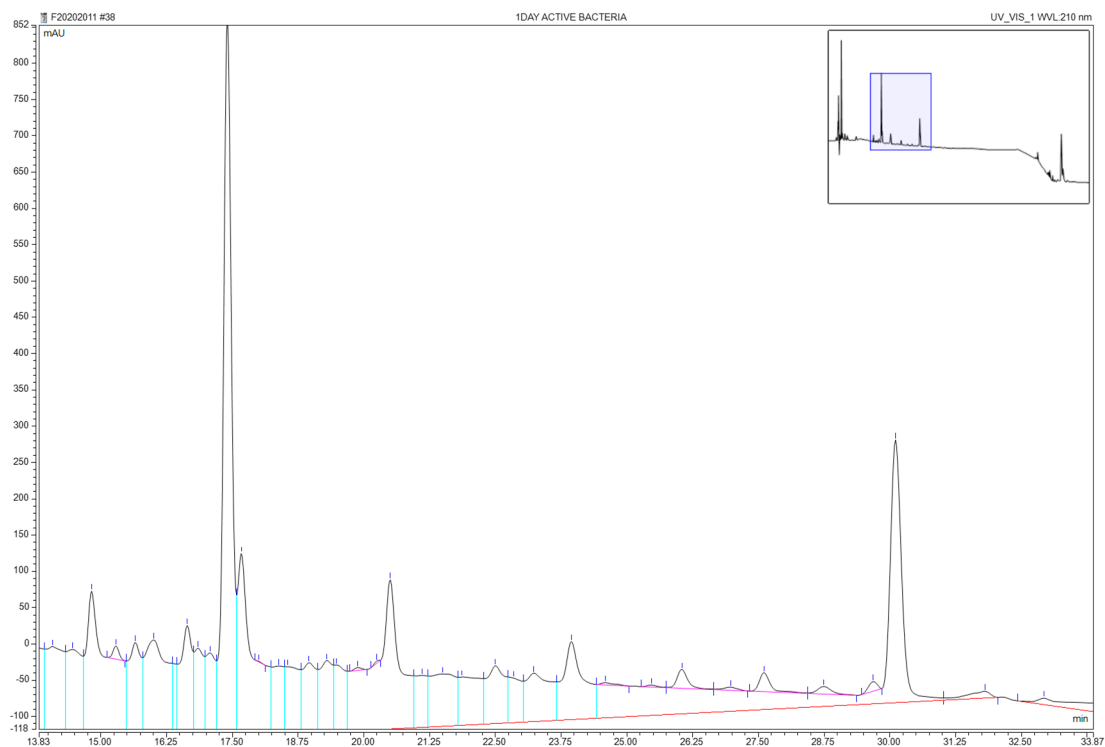

**Figure S9.** HPLC Analysis of natural products synthesized by most active endophytic bacteria *B. halotolerans* XJB-35 on 24 hours

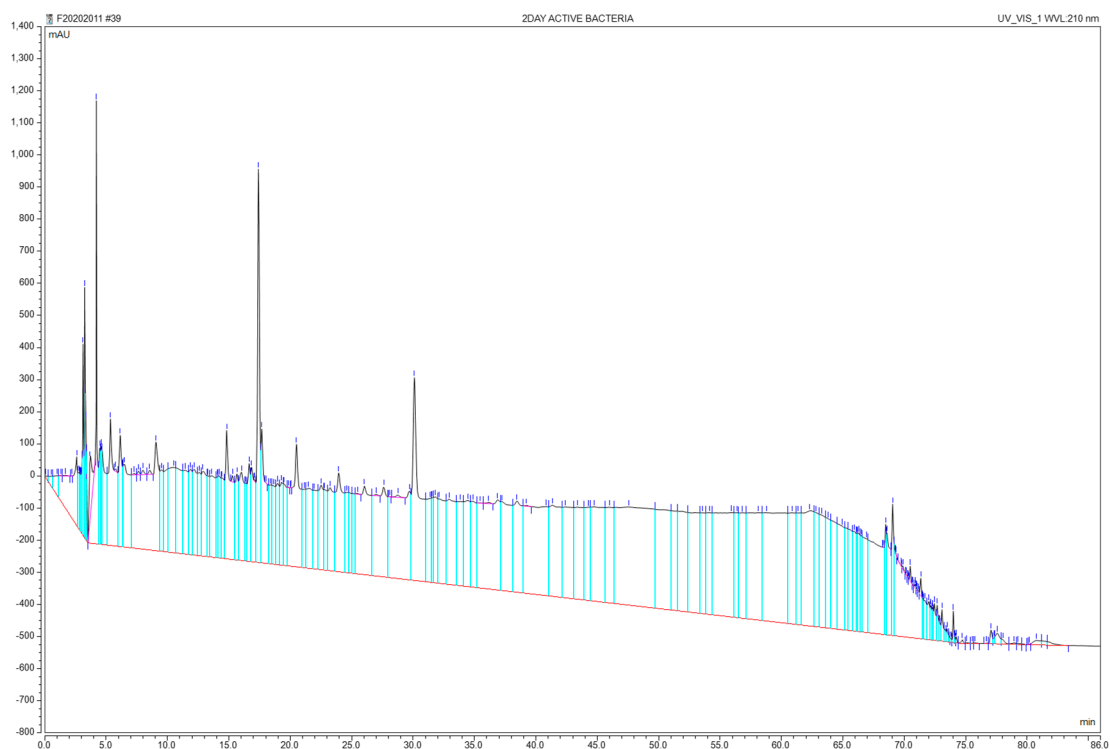

**Figure S10.** HPLC Analysis of natural products synthesized by most active endophytic bacteria *B. halotolerans* XJB-35 on 48 hours

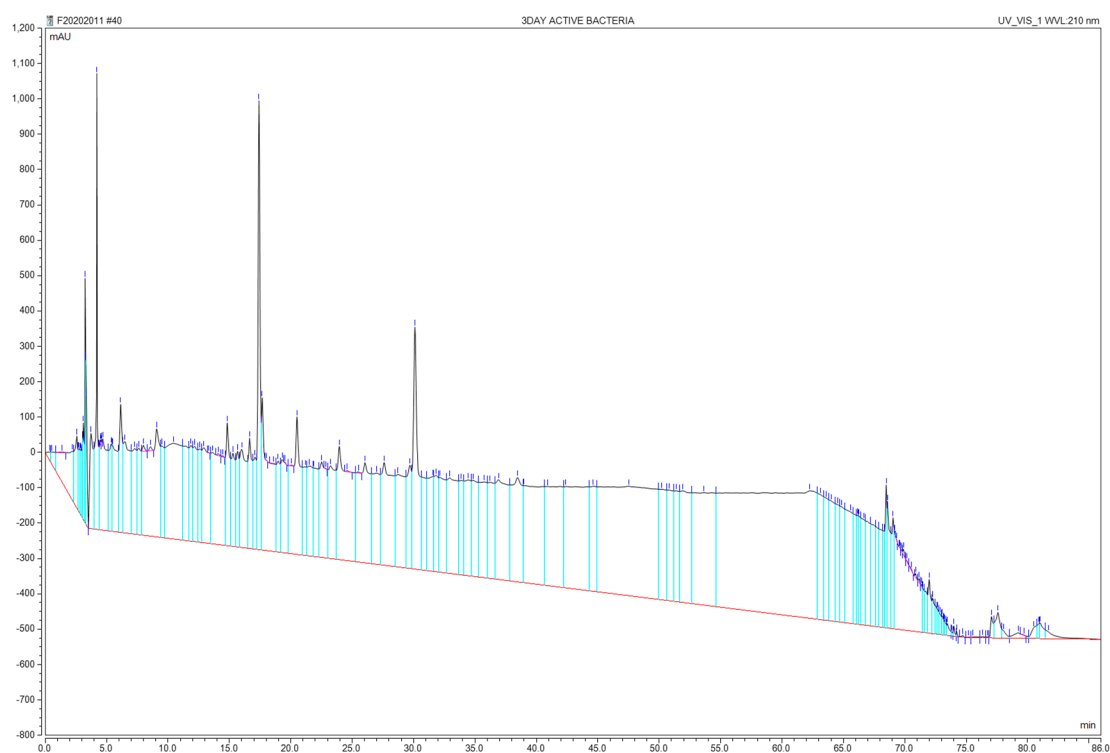

**Figure S11.** HPLC Analysis of natural products synthesized by most active endophytic bacteria *B. halotolerans* XJB-35 on 72 hours

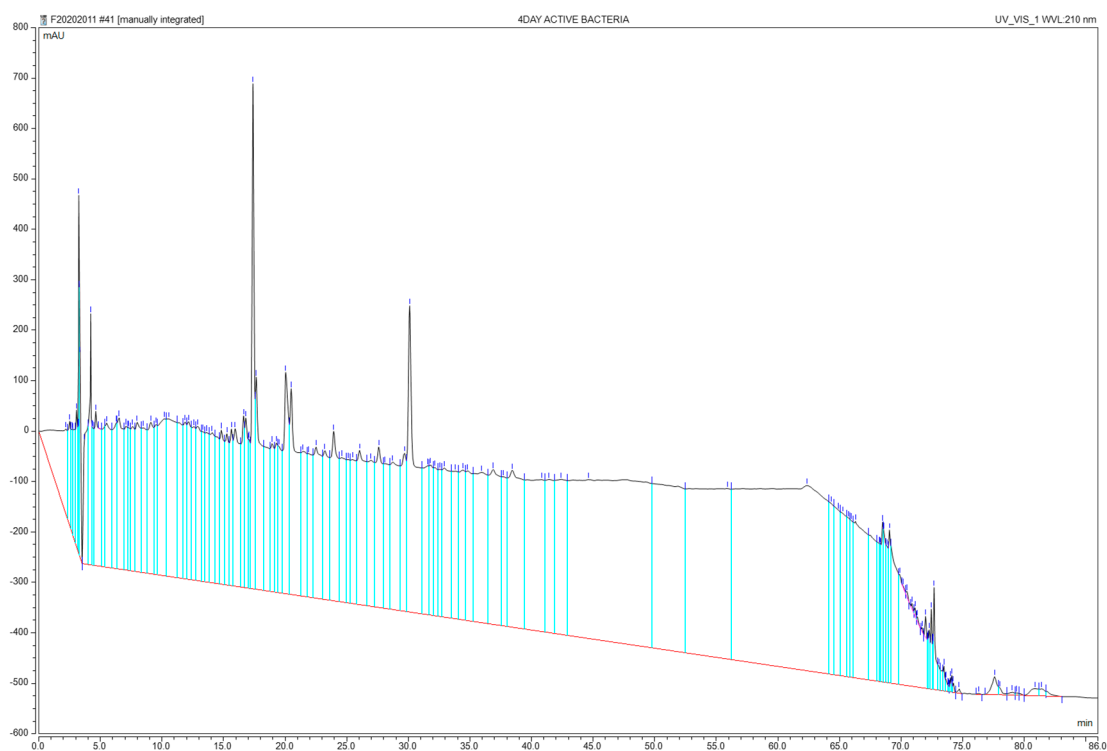

**Figure S12.** HPLC Analysis of natural products synthesized by most active endophytic bacteria *B. halotolerans* XJB-35 on 96 hours

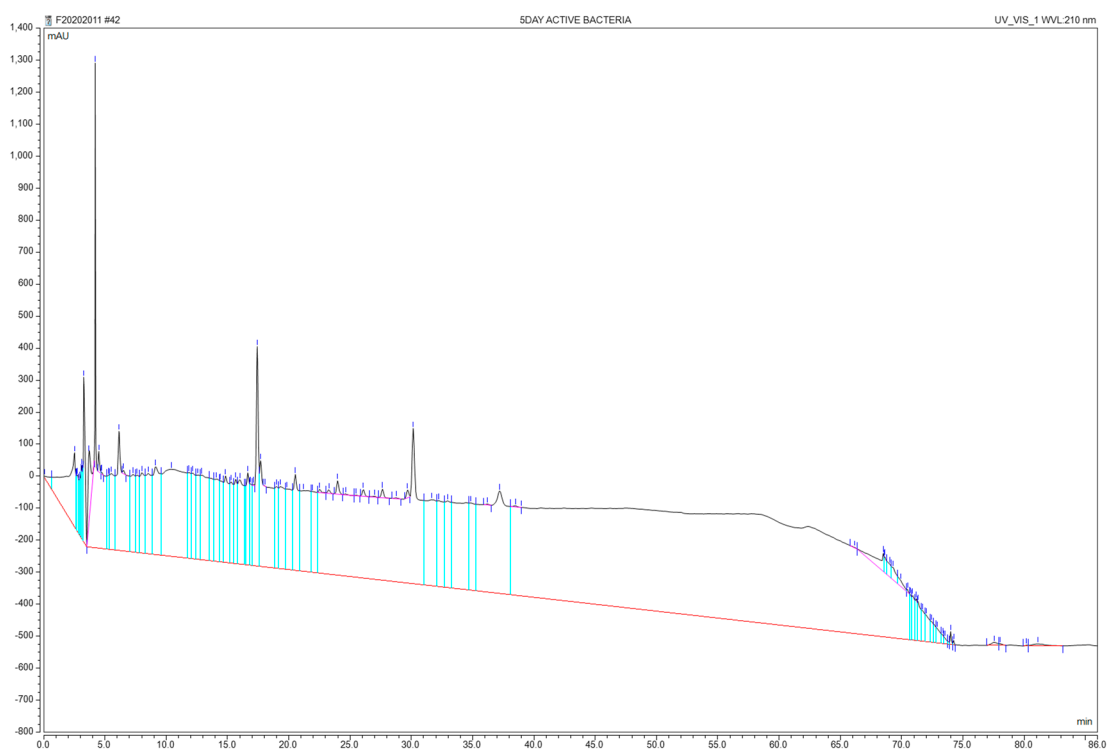

**Figure S13.** HPLC Analysis of natural products synthesized by most active endophytic bacteria *B. halotolerans* XJB-35 on 120 hours

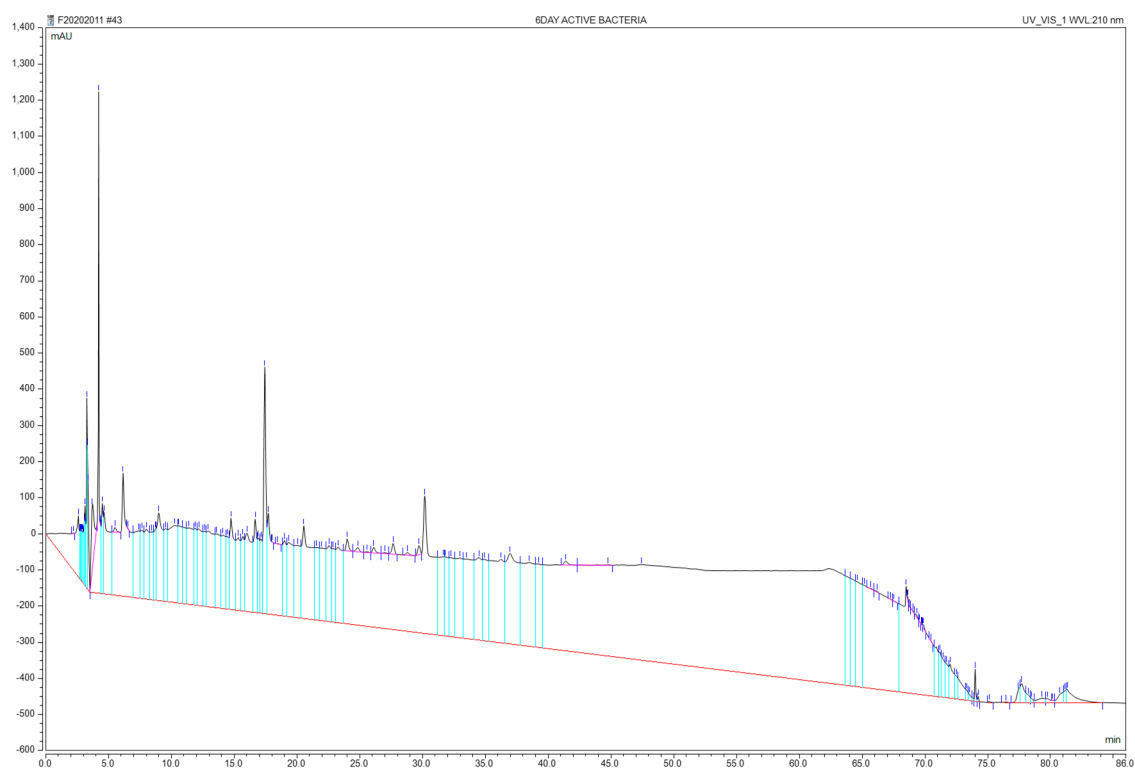

**Figure S14.** HPLC Analysis of natural products synthesized by most active endophytic bacteria *B. halotolerans* XJB-35 on 144 hours

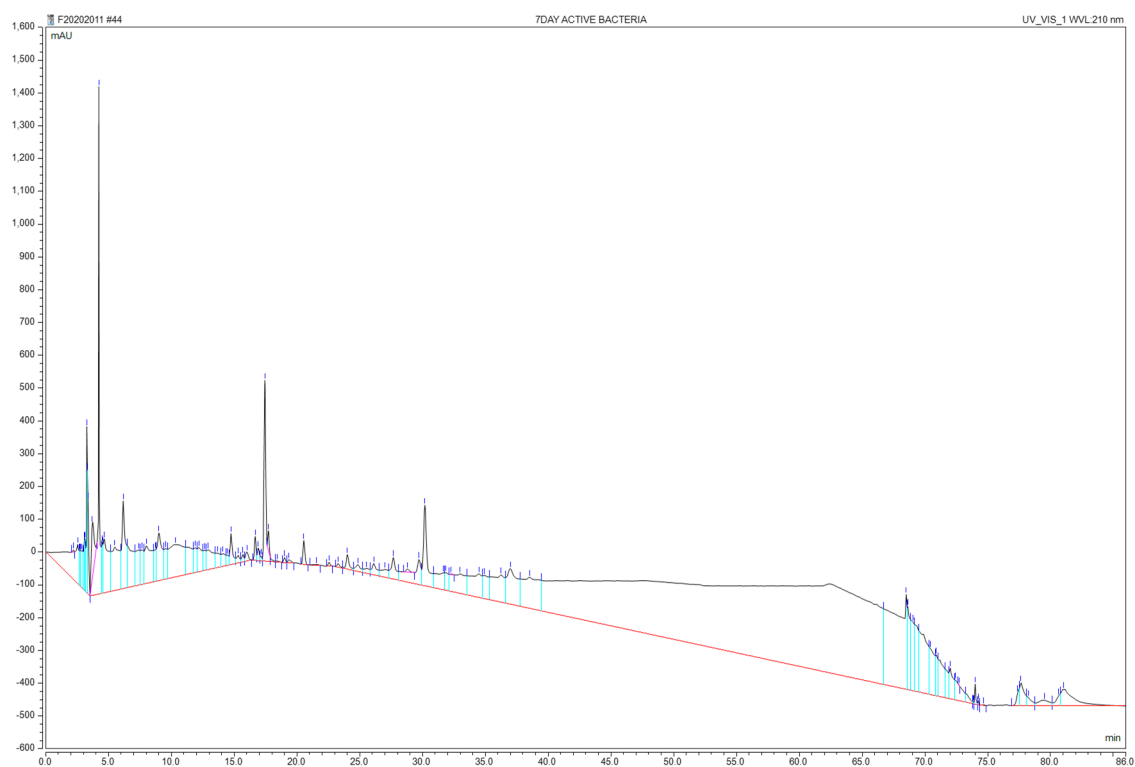

**Figure S15.** HPLC Analysis of natural products synthesized by most active endophytic bacteria *B. halotolerans* XJB-35 on 168 hours

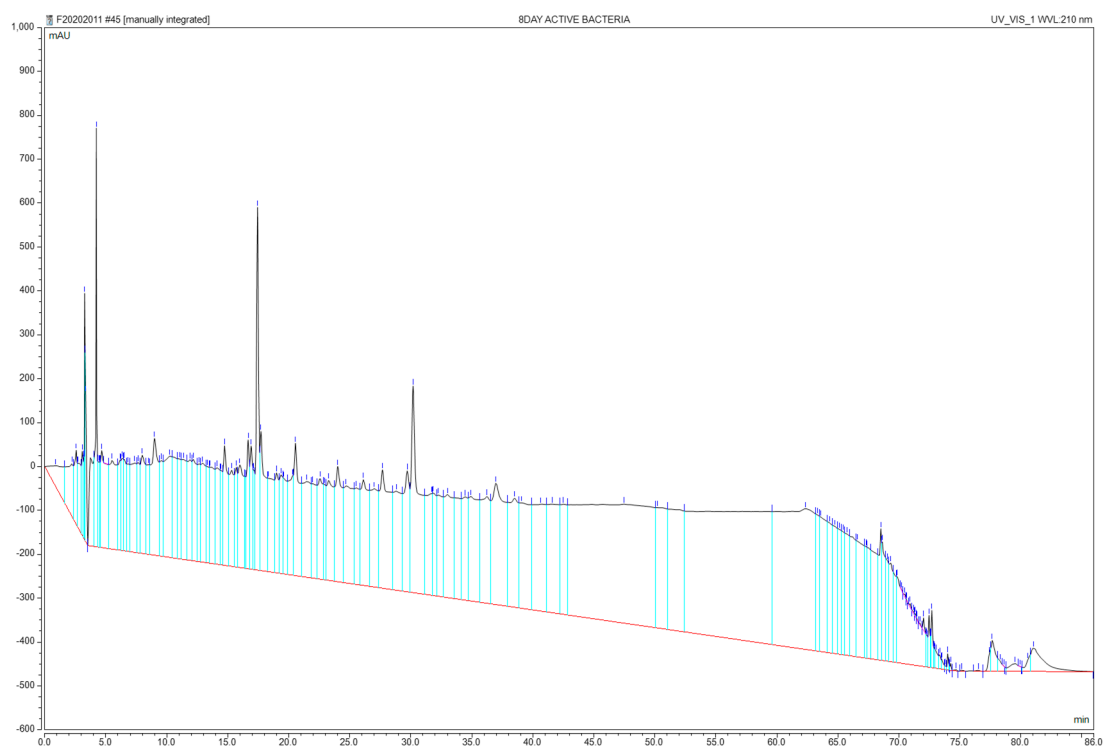

**Figure S16.** HPLC Analysis of natural products synthesized by most active endophytic bacteria *B. halotolerans* XJB-35 on 192 hours

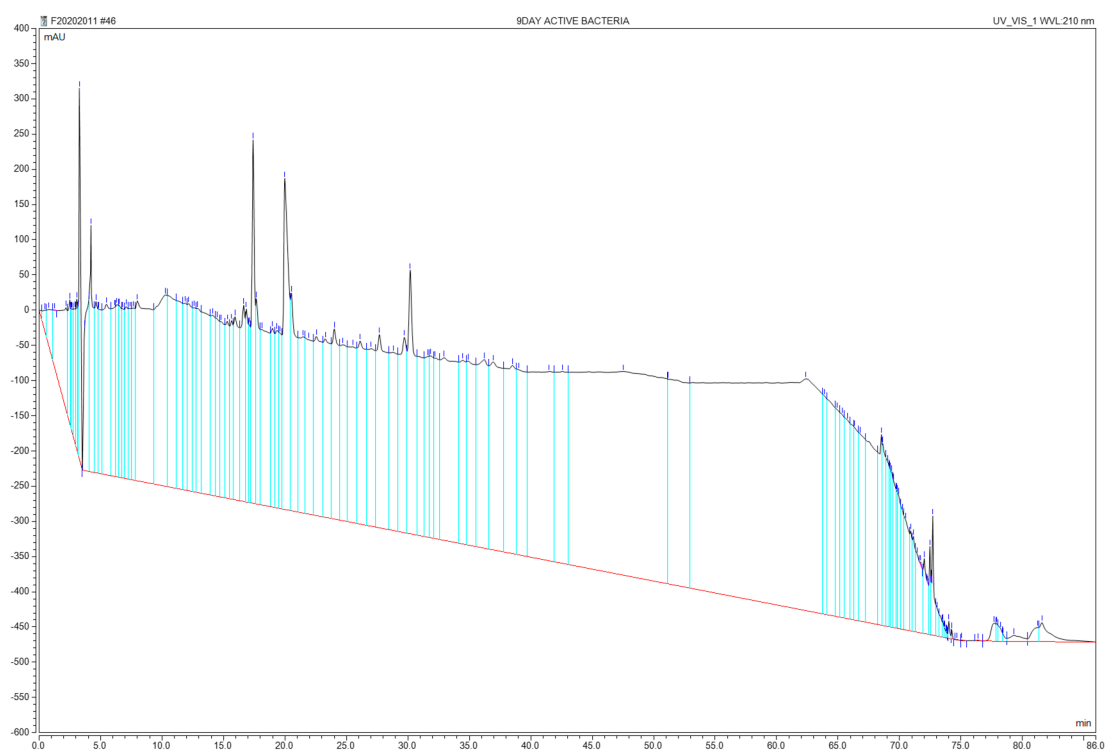

**Figure S17.** HPLC Analysis of natural products synthesized by most active endophytic bacteria *B. halotolerans* XJB-35 on 216 hours

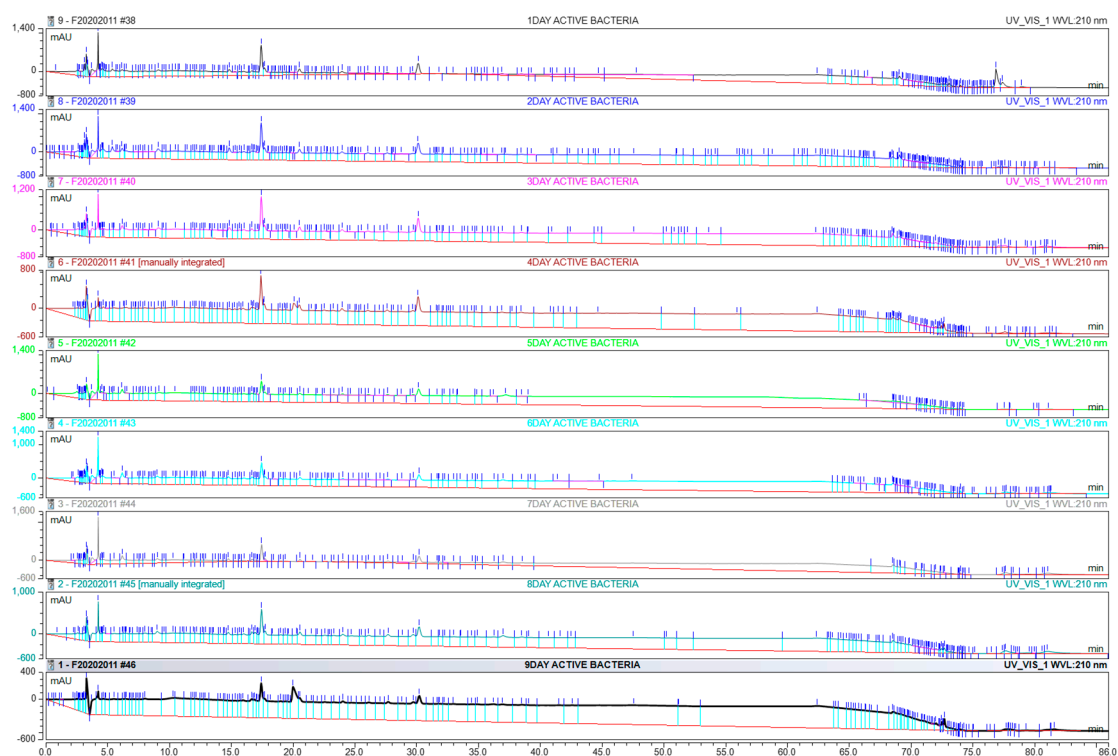

**Figure S18.** HPLC Analysis of natural products synthesized by most active endophytic bacteria *B. halotolerans* XJB-35 on different incubation times

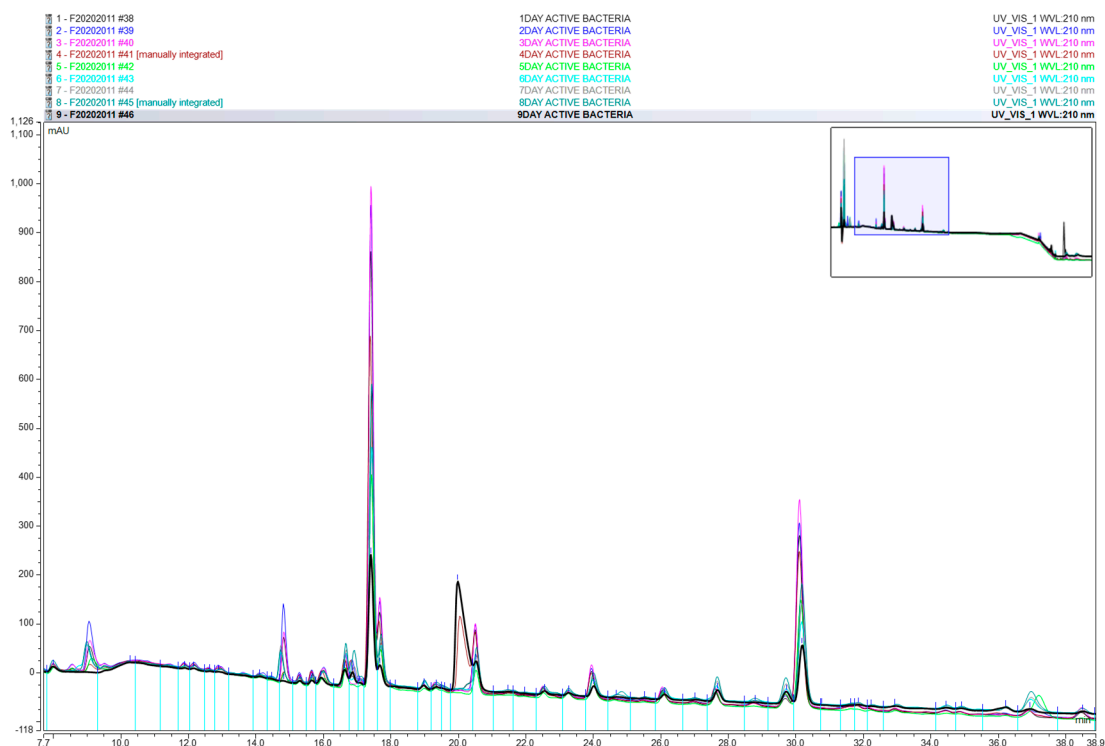

**Figure S19.** HPLC Analysis of natural products synthesized by most active endophytic bacteria *B. halotolerans* XJB-35 on different incubation times

**HPLC Analysis of natural products synthesized in different medium by most active endophytic bacteria *B. halotolerans* XJB-35**

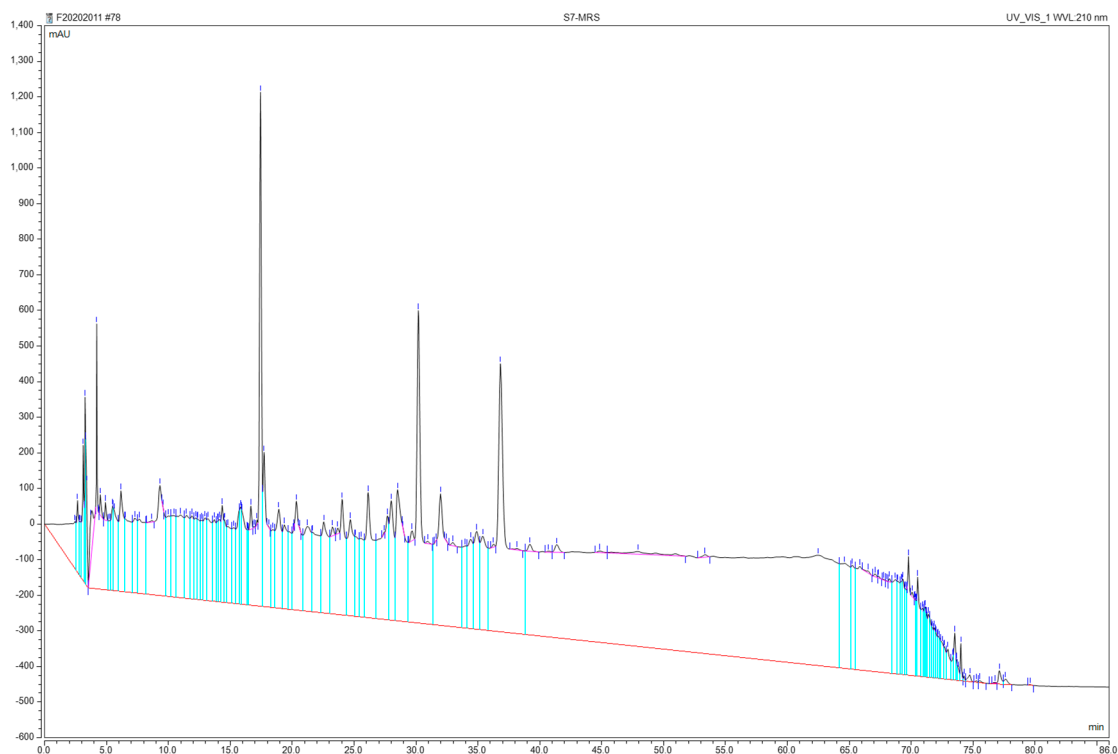

**Figure S20.** HPLC Analysis of natural products synthesized by most active endophytic bacteria *B. halotolerans* XJB-35 on MRS media

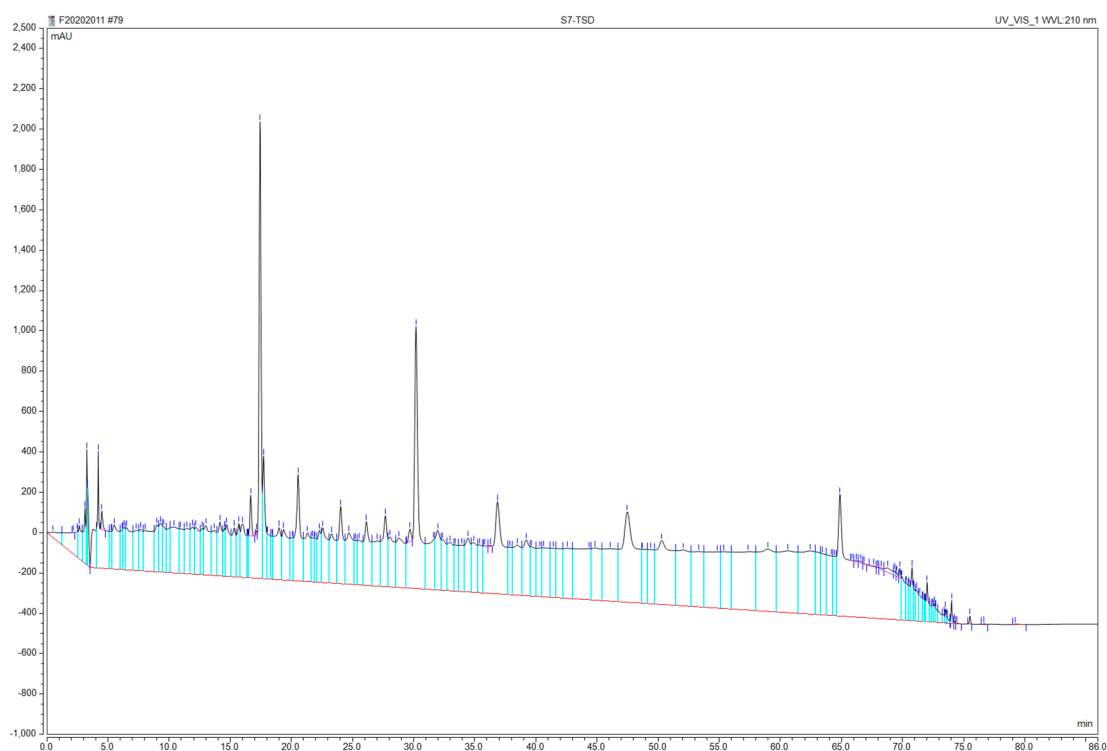

**Figure S21.** HPLC Analysis of natural products synthesized by most active endophytic bacteria *B. halotolerans* XJB-35 on TSD media

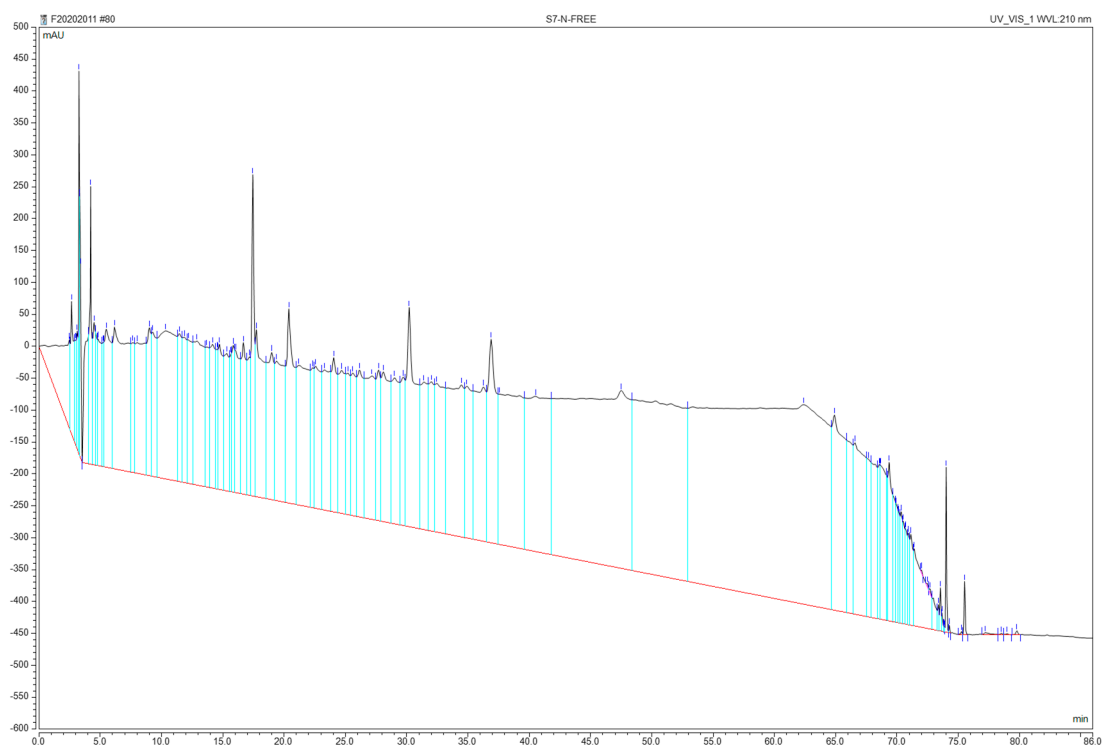

**Figure S22.** HPLC Analysis of natural products synthesized by most active endophytic bacteria *B. halotolerans* XJB-35 on N-Free media

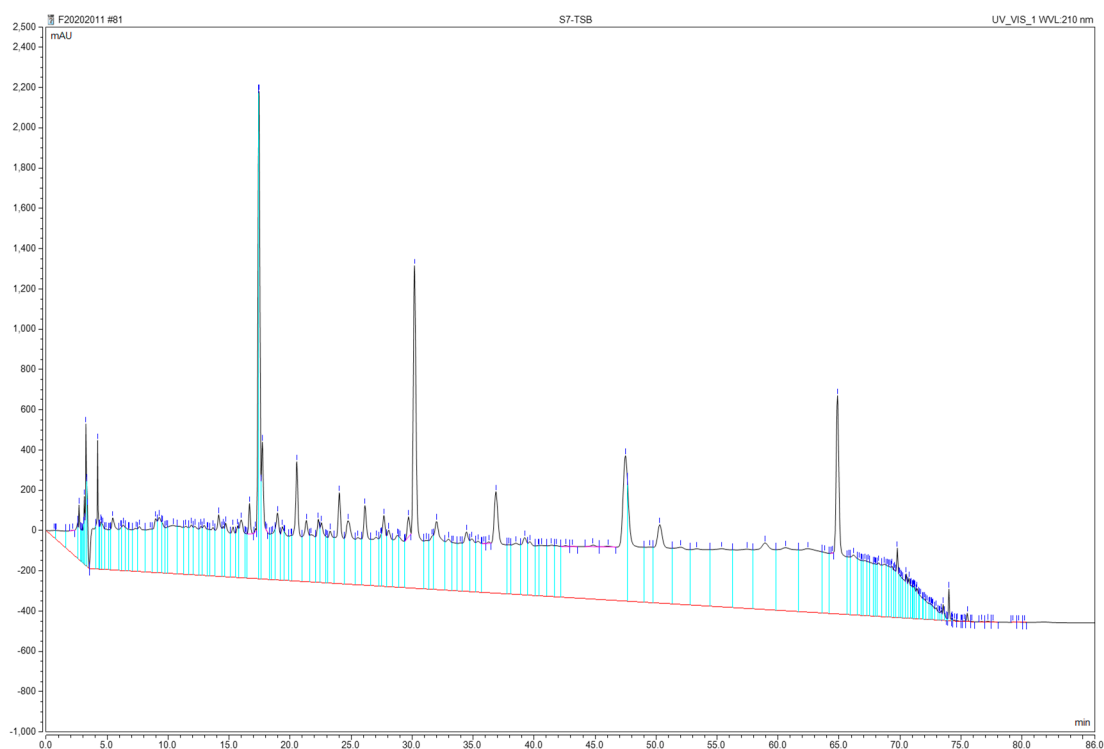

**Figure S23.** HPLC Analysis of natural products synthesized by most active endophytic bacteria *B. halotolerans* XJB-35 on TSB media

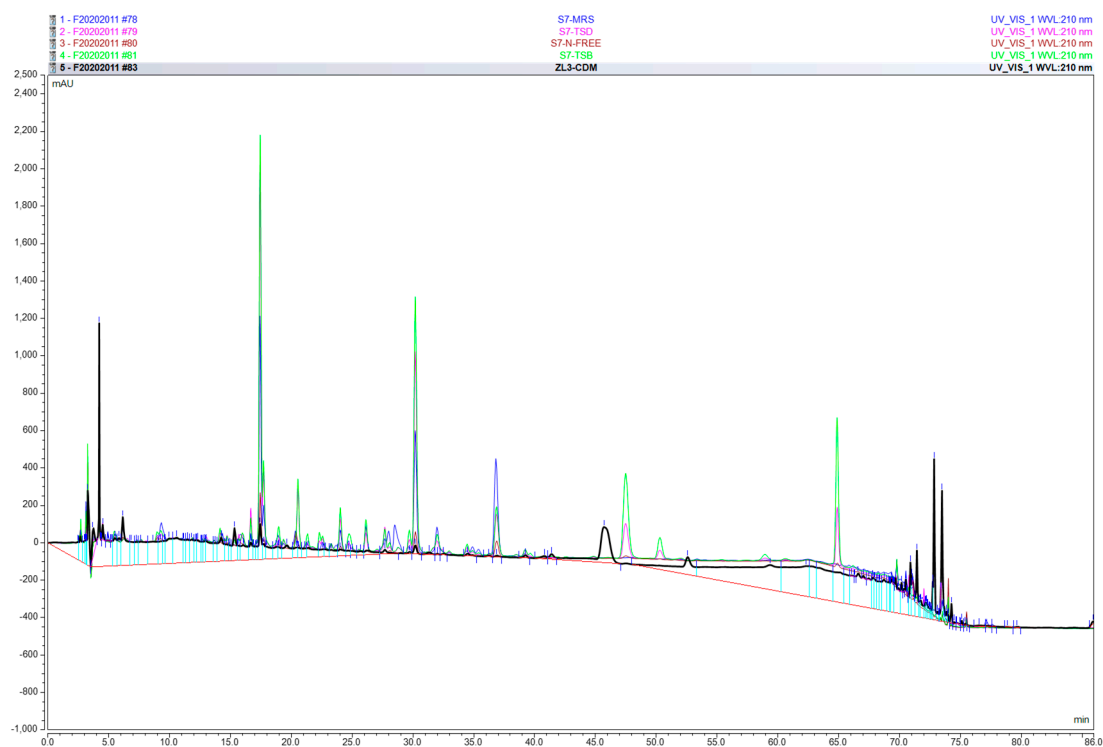

**Figure S24.** HPLC Analysis of natural products synthesized by most active endophytic bacteria *B. halotolerans* XJB-35 on different media

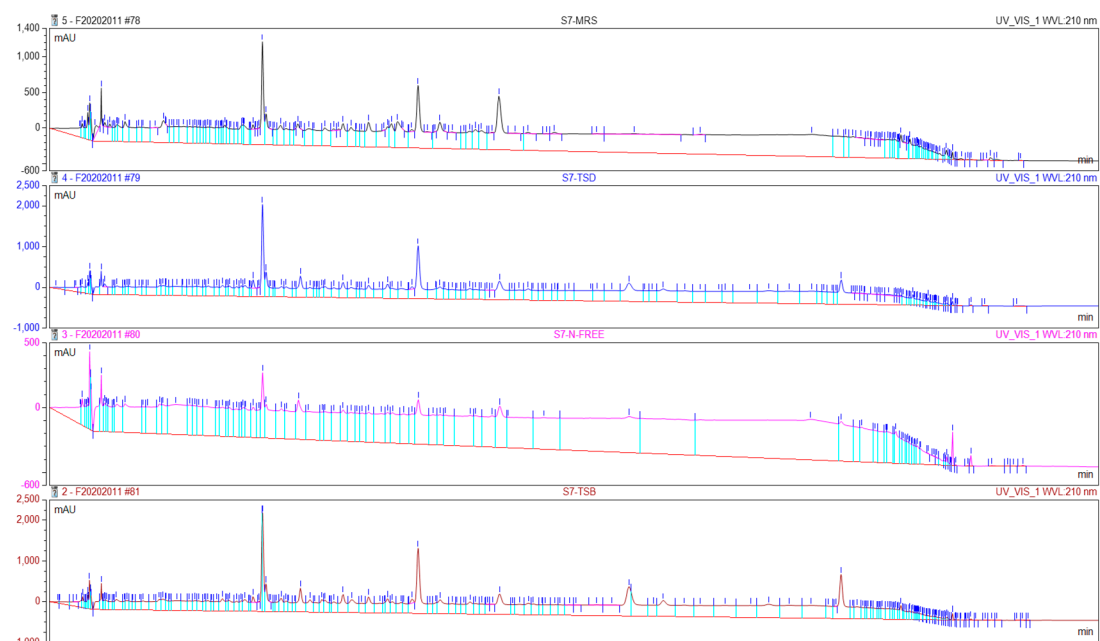

**Figure S25.** HPLC Analysis of natural products synthesized by most active endophytic bacteria *B. halotolerans* XJB-35 on different media

## Chemical composition of most active bacteria strain *B. halotolerans* XJB-35

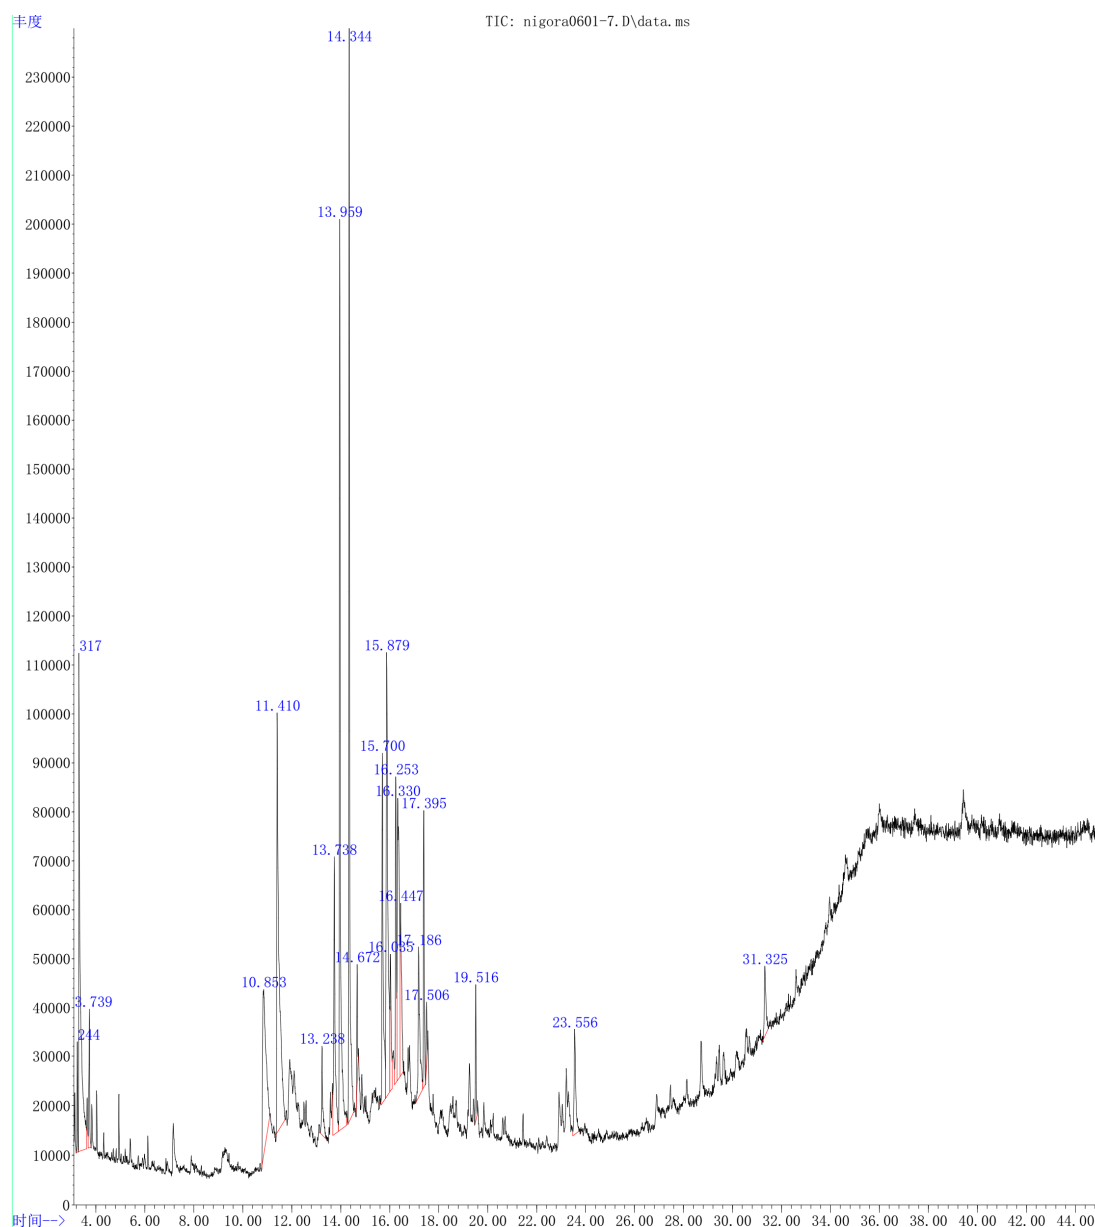

**Figure S26.** Volatile chemical component of most active endophytic bacteria *B. halotolerans* XJB-35 on different **NB** media

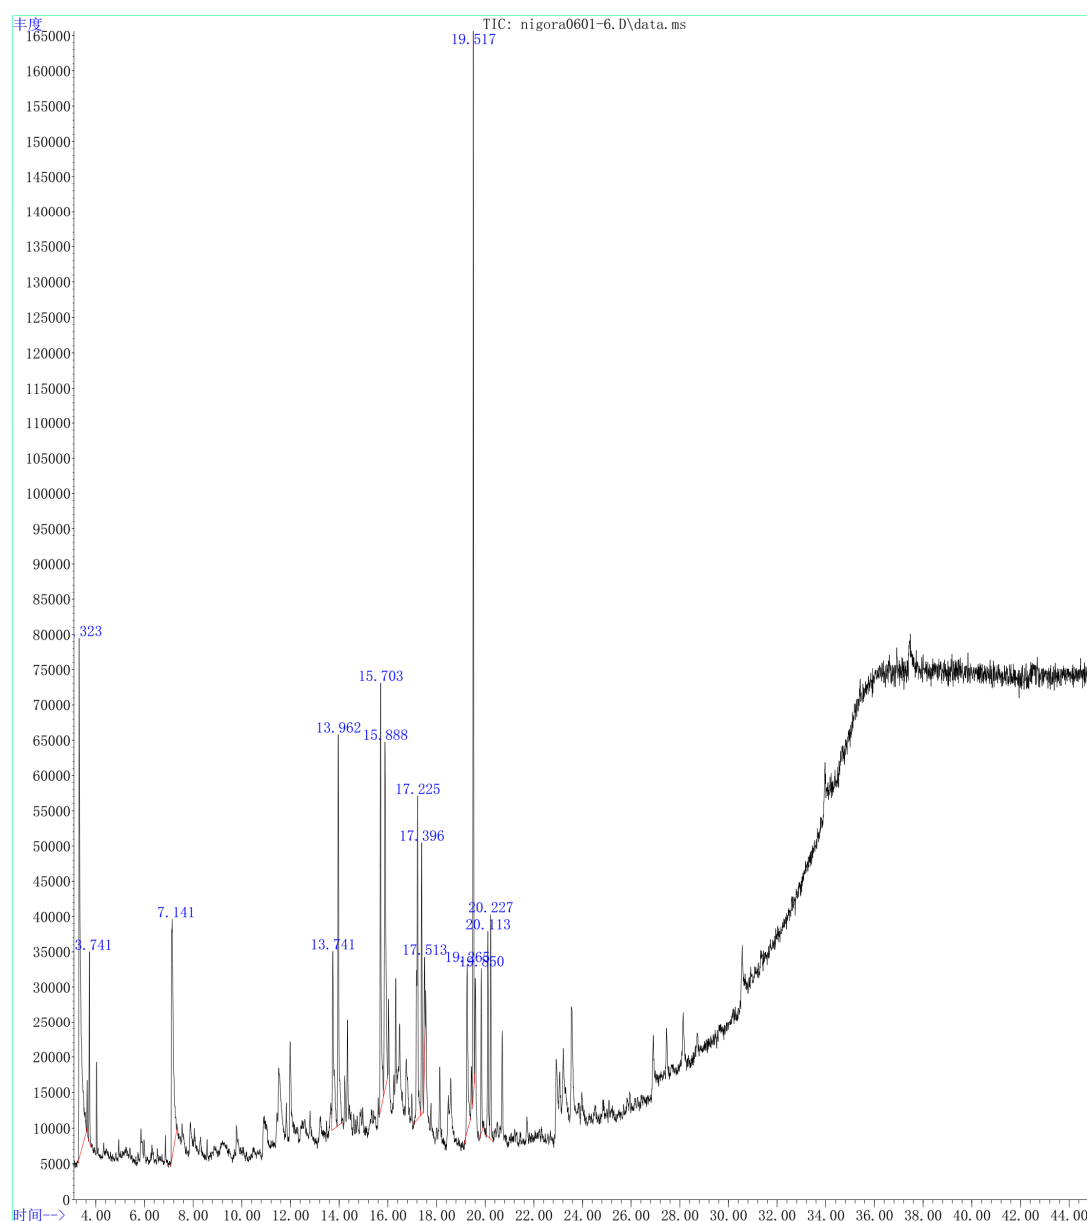

**Figure S27.** Volatile chemical component of most active endophytic bacteria *B. halotolerans* XJB-35 on different **N-free** media

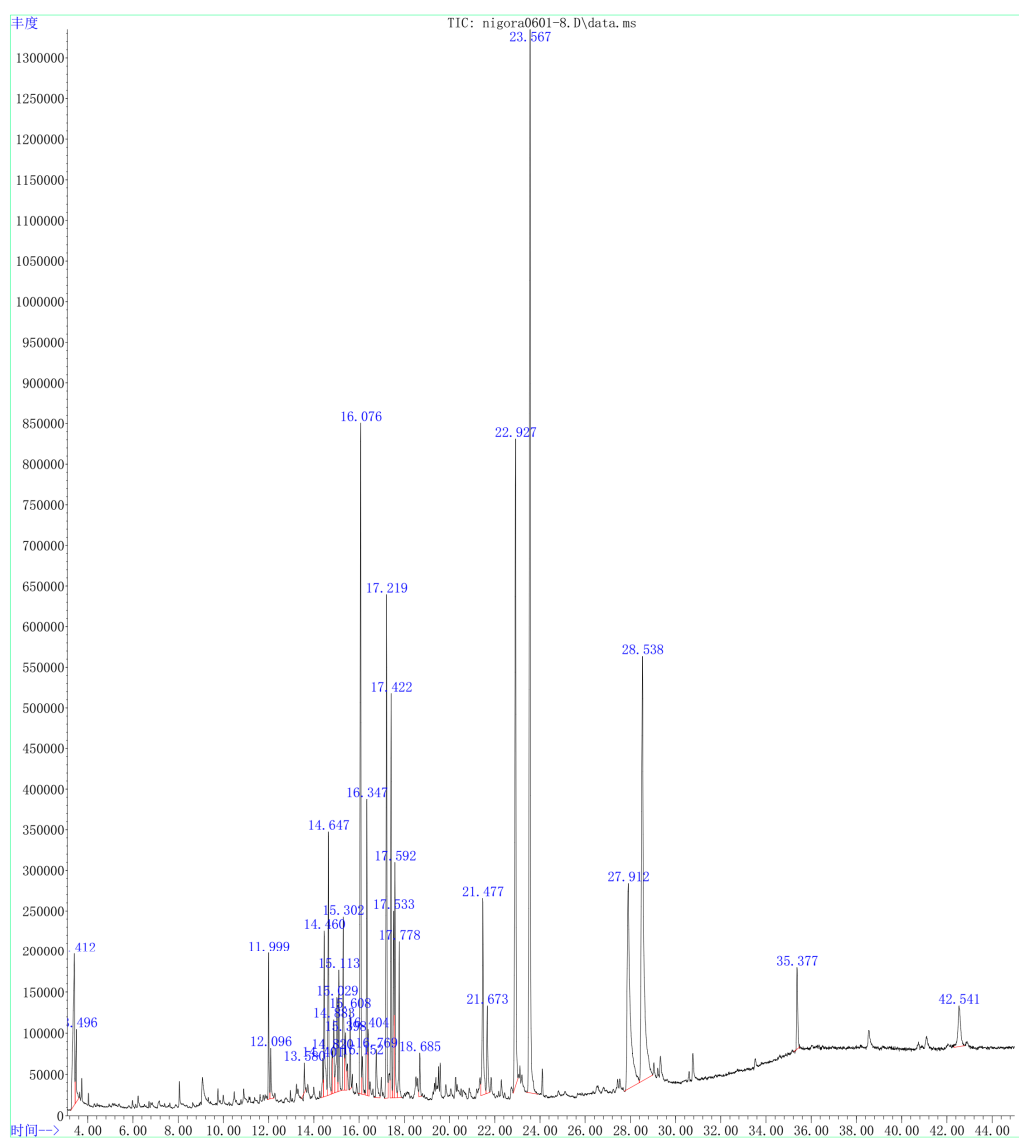

**Figure S28.** Volatile chemical component of most active endophytic bacteria *B. halotolerans* XJB-35 on different TSD media

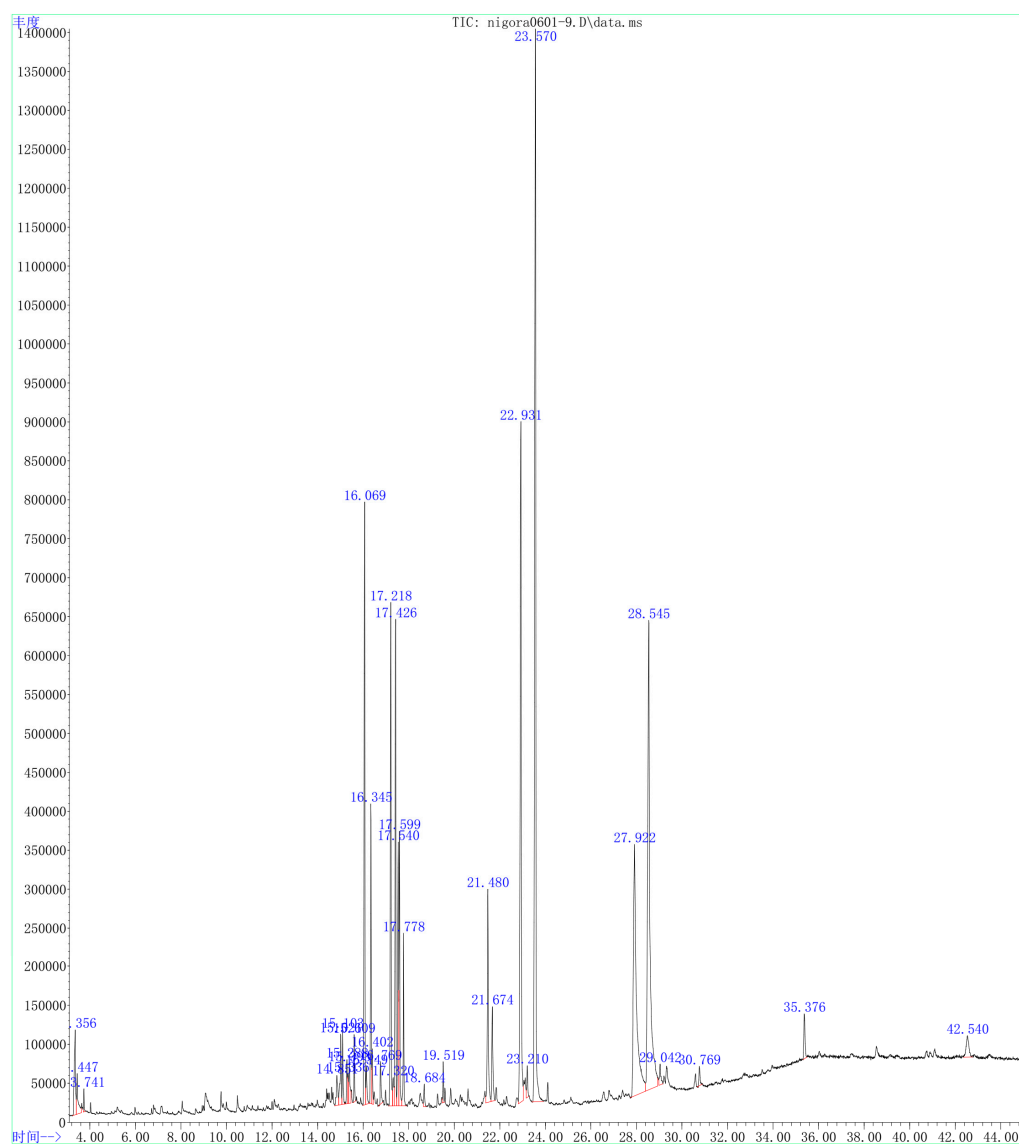

**Figure S29.** Volatile chemical component of most active endophytic bacteria *B. halotolerans* XJB-35 on different TSB media

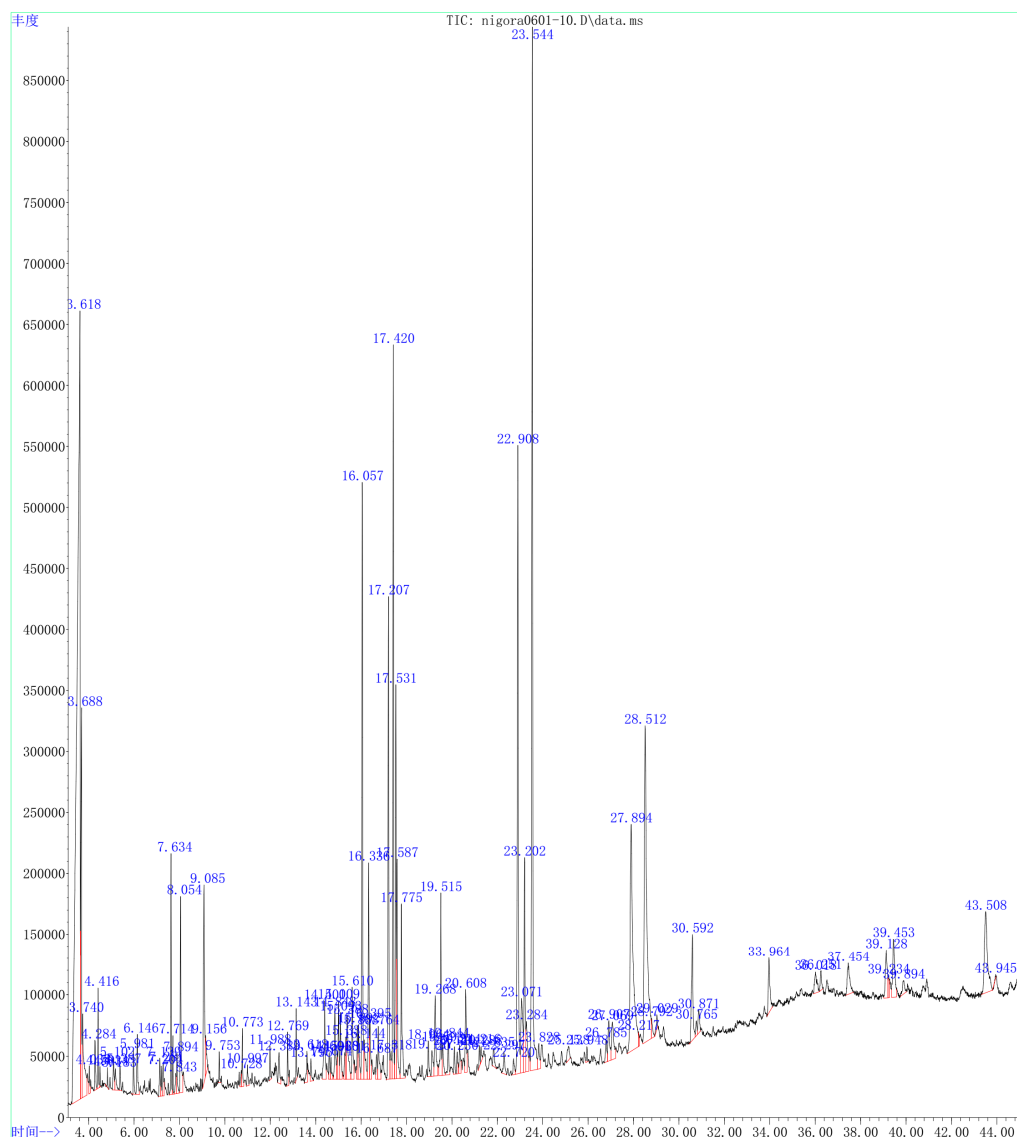

**Figure S30.** Volatile chemical component of most active endophytic bacteria *B. halotolerans* XJB-35 on different MRS media

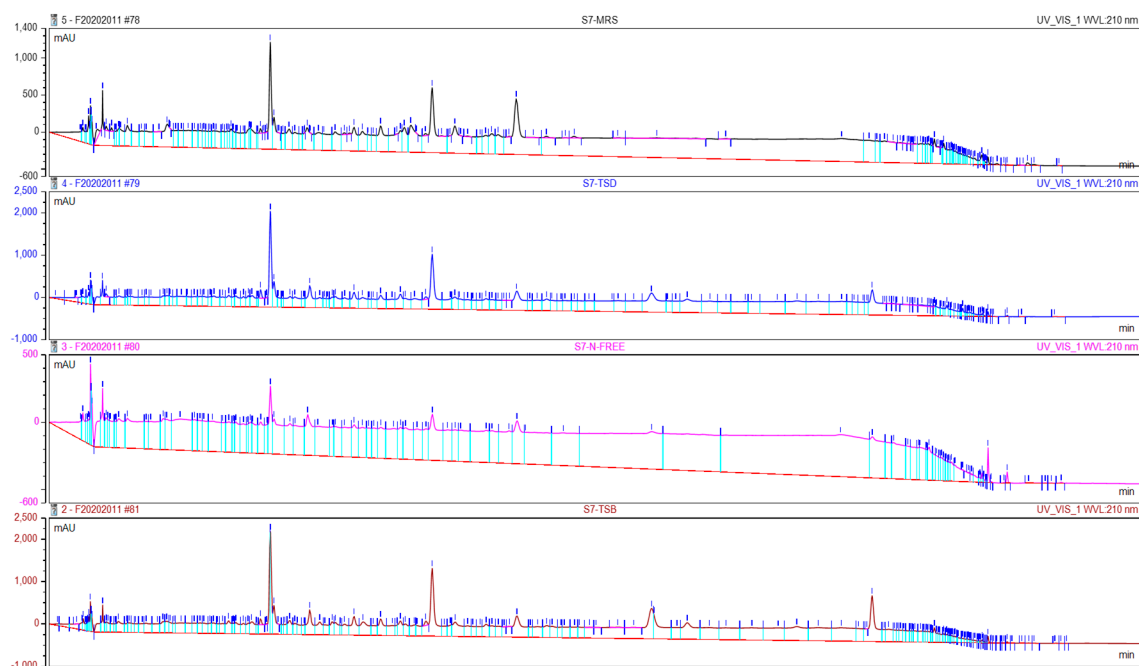

**Figure S31.** HPLC analysis of secondary metabolites produced by the most-active endophytic bacteria *B. halotolerans* XJB-35 on different culture media
